1 A putative microcin amplifies Shiga toxin 2a production of *Escherichia coli* O157:H7

2 Running Title: Putative microcin amplifies Stx2a of O157:H7

3

4 Hillary M. Figler<sup>a</sup>, Lingzi Xiaoli<sup>b</sup>, Kakolie Banerjee, Maria Hoffmann<sup>c</sup>, Kuan Yao<sup>c</sup>, Edward G.  
5 Dudley<sup>bd#</sup>

6 <sup>a</sup> The Huck Institutes of the Life Sciences, The Pennsylvania State University, University Park,  
7 PA 16802

8 <sup>b</sup> Food Science Department, The Pennsylvania State University, University Park, PA 16802

9 <sup>c</sup> Center for Food Safety and Nutrition, U.S. Food and Drug Administration, College Park, MD

10 <sup>d</sup> Director of the *E. coli* Reference Center, The Pennsylvania State University, University Park,  
11 PA 16802

12

13 <sup>#</sup> Edward G. Dudley, [egd100@psu.edu](mailto:egd100@psu.edu)

14

15 Abstract word count: 315

16 Text word count: 5028

17

18 \* Lingzi Xiaoli: Division of Bacterial Diseases, Centers for Disease Control and Prevention,  
19 Atlanta, Georgia 30333. Kakolie Banerjee: MilliporeSigma, Bedford, MA 01730

20

21

22

23

## 24 **Abstract**

25 *Escherichia coli* O157:H7 is a foodborne pathogen, implicated in various multi-state  
26 outbreaks. It encodes Shiga toxin on a prophage, and Shiga toxin production is linked to phage  
27 induction. An *E. coli* strain, designated 0.1229, was identified that amplified Stx2a production  
28 when co-cultured with *E. coli* O157:H7 strain PA2. Growth of PA2 in 0.1229 cell-free  
29 supernatants had a similar effect, even when supernatants were heated to 100°C for 10 min, but  
30 not after treatment with Proteinase K. The secreted molecule was shown to use TolC for export  
31 and the TonB system for import. The genes sufficient for production of this molecule were  
32 localized to a 5.2 kb region of a 12.8 kb plasmid. This region was annotated, identifying  
33 hypothetical proteins, a predicted ABC transporter, and a cupin superfamily protein. These genes  
34 were identified and shown to be functional in two other *E. coli* strains, and bioinformatic  
35 analyses identified related gene clusters in similar and distinct bacterial species. These data  
36 collectively suggest *E. coli* 0.1229 and other *E. coli* produce a microcin that induces the SOS  
37 response in target bacteria. Besides adding to the limited number of microcins known to be  
38 produced by *E. coli*, this study provides an additional mechanism by which *stx2a* expression is  
39 increased in response to the gut microflora.

40

## 41 **Importance**

42 How the gut microflora influences the progression of bacterial infections is only  
43 beginning to be understood. Antibiotics are counter-indicated for *E. coli* O157:H7 infections, and  
44 therefore treatment options are limited. An increased understanding of how the gut microflora  
45 directs O157:H7 virulence gene expression may lead to additional treatment options. This work  
46 identified *E. coli* that enhance the production of Shiga toxin by O157:H7, through the secretion

47 of a proposed microcin. This work demonstrates another mechanism by which non-O157 *E. coli*  
48 strains may increase Shiga toxin production, and adds to our understanding of microcins, a group  
49 of antimicrobials that are less well understood than colicins.

50

## 51 **Introduction**

52 *E. coli* O157:H7 is a notorious member of the enterohemorrhagic *E. coli* (EHEC)  
53 pathotype, which causes hemolytic colitis and hemolytic uremic syndrome (HUS) through  
54 production of virulence factors including the locus of enterocyte effacement (LEE) and Shiga  
55 toxins (Stx) (1, 2). Stx is encoded on a lambdoid prophage (3). Induction of the prophage and  
56 subsequent upregulation of *stx* is tied to activation of the bacterial SOS response (4). Therefore,  
57 DNA damaging agents including certain antibiotics increase Stx synthesis, and are typically  
58 counter indicated during treatment (5). There are two Stx types, referred to as Stx1 and Stx2 (6).  
59 Stx1 is further divided into three subtypes, Stx1a, Stx1c and Stx1d (7). Stx2 also has multiple  
60 subtypes, designated Stx2a, Stx2b, Stx2c, Stx2d, Stx2e, Stx2f, Stx2g (7), Stx2h (8) and Stx2i (9).  
61 In general, infections caused by Stx1, and interestingly, even those with both Stx1 and Stx2  
62 (such as strains EDL933 (10) and Sakai (11)) are associated with less severe disease symptoms  
63 than Stx2-only producing *E. coli* (12–14). Of the Stx2 subtypes, Stx2a is more commonly  
64 associated with clinical cases and instances of HUS (14–17). Indeed, the FAO and WHO  
65 considers STEC carrying *stx2a* to be of greatest concern (18).

66 Stx2a levels can be affected *in vitro* and *in vivo* when *E. coli* O157:H7 is cultured along  
67 with other bacteria. Indeed, it was found that *stx2a* expression is downregulated by various  
68 probiotic species (19, 20) or in a media conditioned with human microbiota (21). Conversely,  
69 non-pathogenic *E. coli* that are susceptible to infection by the *stx2a*-converting phage were

70 reported to increase Stx2a levels (22, 23). This mechanism is O157:H7 strain-dependent (23),  
71 and requires expression of the *E. coli* BamA, which is the phage receptor (24, 25).

72 Production of Stx2a by O157:H7 can also increase in response to molecules secreted by  
73 other members of the gut microbiota (24, 26), such as bacteriocins and microcins. Bacteriocins  
74 are proteinaceous toxins produced by bacteria that inhibit the growth of closely related bacteria.  
75 For example, a colicin E9 (ColE9) producing strain amplified Stx2a when grown together with  
76 Sakai to higher levels than a colicin E3 (ColE3) producing strain (26). ColE9 is a DNase, while  
77 ColE3 has RNase activity, and this may explain the differences in SOS induction and Stx2a  
78 levels. In support of this, the addition of extracted DNase colicins to various *E. coli* O157:H7  
79 strains increased Stx2a production, but not Stx1 (26). Additionally, microcin B17 (MccB17), a  
80 DNA gyrase inhibitor, was shown to amplify Stx2a production (24).

81 This work is part of a continuing effort to identify mechanisms by which members of the  
82 gut microbiome, especially *E. coli*, enhance Stx2a production of *E. coli* O157:H7. Of particular  
83 interest was the identification of secreted enhancer molecules, which were not investigated in our  
84 earlier studies. It was hypothesized that non-pathogenic *E. coli* strains could secrete additional  
85 colicins and microcins capable of increasing Stx2a production by O157:H7.

## 86 **Results**

### 87 **0.1229 amplifies Stx2a production in a cell independent manner**

88 Human-associated *E. coli* isolates were tested for their ability to enhance Stx2a  
89 production in co-culture with O157:H7. Strain 0.1229 significantly increased Stx2a production  
90 of PA2, compared to PA2 alone (Fig. 1). C600 was included as a positive control, as it was  
91 previously shown to increase Stx2a production when co-cultured with O157:H7 (22, 23).

92 Growth of PA2 in cell-free supernatants of 0.1229 also amplified Stx2a production,  
93 indicating this phenomenon does not require whole cells (Fig. 2A). Sequencing of the genome of  
94 0.1229 using Illumina technology revealed that it belonged to the same sequence type (ST73) as  
95 *E. coli* strains CFT073 (27) and Nissle 1917 (28), and carried a plasmid similar to pRS218 in *E.*  
96 *coli* RS218 (29). However, supernatants harvested after growth of these strains failed to increase  
97 Stx2a production by PA2 (Fig. 2A). To test whether increased Stx2a production was dependent  
98 on *recA*, 0.1229 was co-cultured with the W3110 $\Delta$ *tolC* *PrecA-gfp* reporter strain. As anticipated,  
99 we found that among this collection, only strain 0.1229 increased GFP expression as a co-culture  
100 (Fig. 2B). Treatment of 0.1229 supernatants revealed this bioactivity was resistant to boiling, and  
101 sensitive to Proteinase K (Fig. 2C).

#### 102 **The plasmids of 0.1229 may play a role in Stx2a amplification**

103 Further analysis of the Illumina sequence data revealed high sequence identity between  
104 the chromosomes of 0.1229, CFT073, Nissle 1917 and RS218 (data not shown). The most  
105 notable differences were in predicted plasmid content. To obtain a more complete picture,  
106 PacBio long read technology was used to sequence the genome of 0.1229.

107 The largest plasmid of 0.1229, designated p0.1229\_1, was 114,229 bp, and 99.99%  
108 identical with 100% query coverage to pUTI89 (30) and pRS218 (29) (Fig. 3A). A second  
109 plasmid designated p0.1229\_2 had five identifiable antimicrobial resistance genes, was 96,272  
110 bp, and encoded the operon for microcin B17 (*MccB17*), a microcin that inhibits DNA gyrase  
111 (31). The plasmid p0.1229\_2 shared high sequence identity with other known plasmids, being  
112 99.96% identical with 57% query to pRS218, 97.81% identical with 82% query to pECO-fce  
113 (NCBI accession CP015160) and 100% identical with 89% query to pSF-173-1 (32) (Fig. 3B). A  
114 third plasmid was smaller than the cutoff for size selection used during PacBio library

115 preparation but was closed by Illumina sequencing. This plasmid, designated p0.1229\_3, was  
116 12,894 bp and encoded ampicillin resistance (*blaTEM-1b*) (Fig. 3C). It was similar to pEC16II  
117 (NCBI accession KU932034), 99.85% identical with 61% query, and to pHUSEC41-3 (33),  
118 98.89% identical with 61% query.

119 As RS218 did not amplify Stx2a production (Fig. 2A), it was assumed that p0.1229\_1 did  
120 not encode the genes responsible for this phenotype. Similarly, *E. coli* strain SF-173 did not  
121 increase GFP when co-cultured with W3110 $\Delta$ *tolC* *PrecA-gfp*, suggesting genes encoded on  
122 p0.1229\_2 were also not required (data not shown).

### 123 **Strain 0.1229 encodes microcin B17, which is partially responsible for Stx2a amplification**

124 Microcin B17 (MccB17) is a 3.1 kDa (43 amino acid) DNA gyrase inhibitor that is found  
125 on a seven gene operon, with *mcbA* encoding the 69 amino acid microcin precursor (31).  
126 Although pSF-173-1 encodes this operon, there was a three-nucleotide deletion observed in  
127 *mcbA* in pSF-173-1, compared to an earlier published sequence (31). This deletion is predicted to  
128 shorten a ten Gly homopolymeric stretch by one amino acid residue. Although this Gly rich  
129 region is not important for interaction with the gyrase-DNA complex (34), it seemed prudent to  
130 confirm that the results reported above with strain SF-173 were not due to production of a non-  
131 functional McbA. Therefore, knockouts of *mcbA* ( $\Delta$ *mcbA*), and the entire operon  
132 ( $\Delta$ *mcbABCDEFG*) were constructed in 0.1229. These mutations decreased Stx2a amplification  
133 by O157:H7 compared to wildtype 0.1229 (Fig. 4A) however they did not ablate the Stx2a levels  
134 back to mono-culture levels. Similar results were seen with the *PrecA-gfp* strain (Fig. 4B),  
135 although differences were less pronounced than those seen with the Stx assays.

### 136 **Four ORFs encoded by p0.1229\_3 are necessary for Stx2a amplification phenotype**

137 It was next hypothesized that p0.1229\_3 encoded the activity responsible for Stx2a  
138 amplification by 0.1229 $\Delta$ *mcbA* and 0.1229 $\Delta$ *mcbABCDEFG*. A C600 strain transformed with  
139 p0.1229\_3 amplified Stx2a production of PA2 (Fig. 5), confirming the importance of this  
140 plasmid. By systematically deleting portions of p0.1229\_3, two regions were identified as  
141 essential for increased Stx2a production (Fig. 6A). The genes annotated in these regions are  
142 referred to as hypothetical proteins (hp), domains of unknown (DUF), an ATP-binding cassette  
143 (ABC)-type transporter and a member of the cupin superfamily of conserved barrel domains. The  
144 mutant, 0.1229  $\Delta$ 6 (2850-5473 bp), deleted two open reading frames (ORFs), referred to as *hpl*  
145 and *ABC*, and 0.1229  $\Delta$ 7 (5426-7950 bp) deleted *cupin*, *DUF4440*, *DUF2164*, *hp2*, *hp3* and a  
146 portion of a nuclease (Fig. 6B). These results were confirmed using co-culture assays with the  
147 *PrecA-gfp* reporter (Fig. S1). Insertional inactivation of individual ORFs in these regions  
148 identified four, *hpl*, *abc*, *cupin*, and *hp2*, that were necessary for enhanced Stx2a production  
149 (Fig. 6C). Similar results were shown in co-culture with *PrecA-gfp*, although 0.1229 $\Delta$ *hp2*  
150 showed only a moderate decrease in GFP expression (Fig. S1). Cloning of a 5.2kb region of the  
151 plasmid, spanning upstream of *hpl* through the beginning of the putative nuclease-encoding  
152 gene, confirmed this activity is encoded within this region (Fig. 6D). Cloning of a similar region  
153 that ended after *abc* did not provide C600 the ability to increase GFP (data not shown).

154 *In silico* comparisons identified a nearly identical gene cluster in other species, including  
155 *Shigella sonnei* and *Klebsiella pneumoniae* (Fig. S2). The region of p0.1229\_3 spanning  
156 nucleotides 2745 to 7238bp was greater than 99.6% identical on the nucleotide level, when  
157 comparing all the strains in Fig. S2. Similar gene clusters containing Hp1 at 36 to 68% amino  
158 acid identity, were found in other species as well (Fig. S3). In these clusters, orthologs to *hpl*,  
159 *abc*, and *cupin* were commonly co-localized and the genes were found in the same order.

160 **The secreted molecule requires *tolC* for secretion, and *tonB* for import into target strains**

161 Some bacteriocins and microcins require genes encoded outside of the main operon for  
162 secretion, such as the efflux protein TolC (35). The supernatant of 0.1229 $\Delta$ *tolC* did not increase  
163 Stx2a expression by strain PA2 to levels seen with wildtype 0.1229 supernatants (data not  
164 shown). Similar results were observed in co-culture experiments using the *PrecA-gfp* carrying  
165 strain (Fig. 8). The phenotype was restored when *tolC* was complemented on a plasmid, but only  
166 when tested with the *PrecA-gfp* strain (Fig. 7). Similarly, numerous bacteriocins are translocated  
167 into target cells using the TonB system (36). A *tonB* knockout was constructed in the *PrecA-gfp*  
168 reporter strain, as we were unsuccessful generating this in a O157:H7 background. In co-culture  
169 with 0.1229, the MG1655 $\Delta$ *tonB* *PrecA-gfp* strain produced lower GFP levels than the MG1655  
170 *PrecA-gfp* strain (Fig. 8). This phenotype was restored when pBAD24::*tonB*, but not pBAD24,  
171 was transformed into the mutant strain (Fig. 8).

172 **The gene cluster was identified in additional strains**

173 Lastly, it was hypothesized that *E. coli* isolated from human feces would encode the  
174 similar molecules identified here. A total of 101 human fecal *E. coli* isolates were obtained from  
175 Penn State's *E. coli* Reference Center, and three of these were found to induce GFP production  
176 in the *PrecA-gfp* reporter assay (Fig. S4). Furthermore, the supernatants of two of these isolates,  
177 designated 91.0593 and 99.0750, increased Stx2a to levels similar to 0.1229, however 90.2723  
178 did not (Fig. 9A). Genome sequencing of these three organisms revealed that 91.0593 and  
179 99.0750 carried plasmids similar to p0.1229\_3, however the latter plasmid had a deletion in the  
180 recombinase and transposon regions (Fig. 9B). Strain 99.0750 was molecular serotype O36:H39,  
181 while 91.0593 could not be O typed but was identified as H10.

182  
183



## 184 Discussion

185 The concentration of *E. coli* in human feces ranges from  $10^7$  to  $10^9$  colony forming units  
186 (CFU) (37, 38). Typically, there are up to five commensal *E. coli* strains colonizing the human  
187 gut at a given time (39, 40). As the human microbiota affects O157:H7 colonization and  
188 virulence gene expression (41–44), it is thought that community differences in the gut microflora  
189 may explain, in part, individual differences in disease symptoms (45). Indeed, commensal *E. coli*  
190 that are susceptible to *stx2*-converting phage can increase phage and Stx production (22, 23). In  
191 mice given a co-culture of O157:H7 and phage-resistant *E. coli*, minimal toxin was recovered in  
192 the feces, but with *E. coli* that were phage-susceptible, higher levels of toxin were found (46).  
193 However, it is clear that phage infection of susceptible bacteria is not the only mechanism by  
194 which the gut microflora affects Stx2 levels during infection (19, 20, 24, 26).

195 In this study, both whole cells and spent supernatants of *E. coli* 0.1229 enhanced Stx2a  
196 production by *E. coli* O157:H7 strain PA2. This latter strain is a member of the hypervirulent  
197 clade 8 (47) and was previously found to be a high Stx2a producer in co-culture with *E. coli*  
198 C600 (23). *E. coli* 0.1229 produces at least two molecules capable of increasing Stx2a. The first  
199 is MccB17, a DNA gyrase inhibitor, shown to activate Stx2a production in an earlier study (24).  
200 This current study identified a second molecule localized to a 12.8 kb plasmid, and all genes  
201 necessary for production are found within a 5.2 kb region. Furthermore, gene knockouts  
202 identified four potential ORFs within this region, *hp1*, *abc*, *cupin* and *hp2*, that are required for  
203 0.1229 mediated Stx2a amplification. This gene cluster was also identified on pB51 (48), a  
204 similar plasmid to p0.1229\_3, however limited characterization was reported.

205 Oxidizing agents, such as hydrogen peroxide ( $H_2O_2$ ), and antibiotics targeting DNA  
206 replication, such as ciprofloxacin, mitomycin C and norfloxacin, are known to induce *stx*-

207 converting phage (5, 49, 50) and subsequently Stx2 production (5, 49). However, the Stx2  
208 amplifying activity of the 0.1229 supernatant was abolished by Proteinase K, suggesting the  
209 inducing molecule is proteinaceous in nature. Colicins are bacteriocins found in *E. coli* (51), are  
210 generally greater than 30 kDa in size, and at least one member has been previously shown to  
211 enhance O157:H7 Stx2 production (26). While some colicins utilize TonB for translocation, they  
212 are not expected to be heat stable. The molecule produced by 0.1229 was resistant to 100°C for  
213 10 minutes, strongly suggesting it is not a colicin.

214         Microcins are bacteriocins that are generally smaller than 10 kDa. Their size and lack of  
215 secondary and tertiary structure make them more heat stable than colicins. Microcins are divided  
216 into three classes; class I and class IIa are plasmid encoded, while class IIb are chromosomally  
217 encoded. Class I and IIb are post-translationally modified (52, 53), while class IIa are not. To  
218 date, all class II but only one member of class I (microcin J25) use an ATP-binding cassette  
219 (ABC)-type transporter in complex with TolC for export (35), and the TonB system for import  
220 into target cells (36). The putative microcin produced by 0.1229 is plasmid encoded, along with a  
221 predicted ABC transporter and is TolC and TonB dependent. Therefore, this microcin appears to  
222 be more closely related to class IIa microcins. However, purification of the microcin to identify  
223 possible post translational modifications is necessary to confirm whether designating as class I or  
224 IIa is more appropriate.

225         There are four known class IIa microcins, microcin V (MccV, previously named colicin  
226 V) (54, 55), microcin N (MccN, previously named Mcc24) (56), microcin L (MccL) (57), and  
227 microcin PDI (MccPDI) (58, 59). The operons encoding these microcins contain four or five  
228 genes, including the microcin precursor, immunity and export genes. MccN also encodes a  
229 putative regulator, with a histone-like nucleoid domain (56). The microcin precursor genes

230 possess leader sequences of approximately 15 amino acids, containing the signature sequence  
231 MRXI/LX(9)GG/A (X=any amino acid), and are typically cleaved by the ABC transporters  
232 during export (60). A potential leader sequence with the double glycine was found in *hp2*.  
233 Additionally, a small peptide (DHGSR) was identified in the supernatants of 0.1229 by mass  
234 spectroscopy (data not shown) corresponding to an ORF internal to *hp2* encoded in the opposite  
235 direction. Future experiments will determine if one of these, or another region, encodes a  
236 secreted microcin.

237         One argument against designation as a class IIa microcin, is the lack of an identifiable N-  
238 terminal proteolytic domain (61) in the predicted ABC transporter encoded on p0.1229\_3. This  
239 domain is found in all other members of class IIa. Interestingly, the class I microcin J25  
240 (MccJ25) also encodes an ABC transporter lacking this domain. Unlike the other class I  
241 microcins, MccJ25 is TolC and TonB dependent for export and import, respectively. While the  
242 possibility cannot be excluded that the system identified here is a class I microcin, if so, it is  
243 more similar to MccJ25 than to other members of this group.

244         While the current mechanism of action is unknown, it is theorized that the putative  
245 microcin causes DNA damage, through double strand breaks, depurination, or inhibition of DNA  
246 replication. Such actions would lead to RecA-dependent phage induction and Stx2 production.  
247 The suspected mode of action would be divergent from the known class IIa microcins, which  
248 target the inner membrane (62) and MccJ25 which inhibits the RNA polymerase (63). Besides  
249 the predicted ABC transporter, the functions of the other ORFs is unclear. We anticipate one of  
250 these may encode an ABC accessory protein, known to be essential for these export complexes  
251 (64). One ORF encodes a cupin domain found in a functionally diverse set of proteins. An  
252 immunity gene protecting the host may also be expected in this region.

253           The genes encoding the putative microcin were additionally found in *E. coli* strains  
254 99.0750 and 91.0593. Genome sequencing of these strains failed to identify genes encoding  
255 MccB17, which may explain the lower levels of Stx2a production seen in co-culture with PA2  
256 compared to those seen with 0.1229. Bioinformatic analyses also identified other *E. coli* that  
257 encode nearly identical regions. Interestingly, one of these was *E. coli* O104:H4 HUS, isolated in  
258 2001 (33), and responsible for a large 2011 outbreak in Germany. However, a premature stop  
259 codon identified in *cupin* suggests it is non-functional. Homologs of *hp1*, *ABC* and *cupin* were  
260 identified together in several other organisms distantly related to *E. coli*, suggesting these encode  
261 a functional unit. The absence of *hp2* in most of these genetic clusters argues against this ORF  
262 encoding the anti-bacterial activity or may suggest that these organisms encode microcins  
263 distinct from *hp2*.

264           In conclusion, a putative microcin was identified in *E. coli*, expanding our knowledge of  
265 this small group of antimicrobial peptides. This study also identifies another mechanism by  
266 which *E. coli* may enhance Stx2a production by *E. coli* O157:H7. Further studies may also  
267 provide new insights into the diverse genetic structure and functions of microcin-encoding  
268 systems.

269

## 270 **Materials & Methods**

### 271 **Bacterial strains, media and growth conditions**

272           *E. coli* strains were grown in Lysogeny Broth (LB) at 37°C unless otherwise indicated,  
273 and culture stocks were maintained in 20% glycerol at -80°C. Antibiotics were used at the  
274 following concentrations; ampicillin (100 µg/ml), chloramphenicol (25 µg/ml), kanamycin (50  
275 µg/ml), and tetracycline (10 µg/ml). All bacterial isolates, plasmids and primers used in this

276 study can be found in Table 1. *E. coli* SF-173-1 was provided by Dr. Craig Stephens, Santa Clara  
277 University.

### 278 **Co-culture with PA2**

279 Co-culture with *E. coli* O157:H7 PA2 was performed similar to previously described  
280 (23). PA2 and commensal *E. coli* strains were grown overnight at 37°C (with shaking at 250  
281 rpm). LB agar (2.5 ml) was added to 6-well plates (BD Biosciences Inc., Franklin Lakes, NJ),  
282 and allowed to solidify. PA2 and commensal strains were each diluted to an OD<sub>600</sub> of 0.05 in 1  
283 ml of LB broth and added to the 6-well plates. A mono-culture of PA2 (at 0.05 OD<sub>600</sub> in 1ml)  
284 served as a negative control. The plates were incubated without shaking at 37°C. After 16 hr,  
285 cultures were collected, cells were lysed with 6 mg/ml polymyxin B at 37°C for 5 min, and  
286 supernatants were collected. Samples were immediately tested with the receptor-based enzyme-  
287 linked immunosorbent assay (R-ELISA), as described below, or stored at -80°C. Total protein  
288 was calculated using the Bradford assay (VMR Life Science, Philadelphia, PA), and used to  
289 calculate µg/mg Stx2.

### 290 **R-ELISA for Stx2a detection**

291 Detection of Shiga toxin was performed using a sandwich ELISA approach, previously  
292 described by Xiaoli *et al.*, 2018 (24). Briefly, 25 µg/ml of ceramide trihexosides (bottom spot)  
293 (Matreya Biosciences, Pleasant Gap, PA) dissolved in methanol was used for coating of the  
294 plate. Washes were performed between each step using PBS and 0.05% Tween-20. Stx2a-  
295 containing samples were diluted in PBS as necessary to obtain final readings in the linear range.  
296 Samples were added to the wells in duplicate and incubated with shaking for 1 hr at room  
297 temperature. Supernatants of *E. coli* PA11, a high Stx2a producer (65), were used as a positive  
298 control. Anti-Stx2 monoclonal mouse antibody (Santa Cruz Biotech, Santa Cruz CA) was added

299 to the plate at a concentration of 1  $\mu\text{g/ml}$ , then incubated for 1 hr. Anti-mouse secondary  
300 antibody (MilliporeSigma, Burlington MA) conjugated to horseradish peroxidase (1  $\mu\text{g/ml}$ ) was  
301 added to the plate, and incubated for 1 hr. For detection, 1 step Ultra-TMB (Thermo-Fischer,  
302 Waltham, MA) was used, and 2M  $\text{H}_2\text{SO}_4$  was added to the wells to stop the reaction. The plate  
303 was read at 450 nm using a DU<sup>®</sup>730 spectrophotometer (Beckman Coulter, Atlanta, GA). A  
304 standard curve was generated from two-fold serially diluted PA11 samples and used to quantify  
305 the  $\mu\text{g/ml}$  of Stx2a present in each sample.

### 306 **Cell-free supernatant assay with PA2**

307 *E. coli* O157:H7 strain PA2 and non-pathogenic *E. coli* strains were individually grown  
308 with shaking at 37°C for 16 hr. Overnight culture of the non-pathogenic strains were centrifuged,  
309 and supernatants were filtered through 0.2  $\mu\text{m}$  cellulose filters (VWR International, Radnor, PA).  
310 LB agar (2.5 ml) was added to the wells of 6-well plates (BD Biosciences Inc., Franklin Lakes,  
311 NJ) and allowed to solidify. PA2 was added to wells at a final density of 0.05  $\text{OD}_{600}$  in 1 ml of  
312 spent supernatant. For the negative control, PA2 was resuspended in fresh LB broth to the same  
313 cell density, and 1 ml was added to a well. The plates were statically incubated at 37°C for 8 hr,  
314 after which the cell density ( $\text{OD}_{600}$ ) was recorded. Cells were lysed with 6 mg/ml Polymyxin B  
315 at 37°C for 5 min and supernatant recovered. Samples were immediately tested for Stx2a by R-  
316 ELISA or stored at -80°C. Data reported as  $\mu\text{g/ml}/\text{OD}_{600}$ .

### 317 **Detection of SOS inducing agents using *PrecA-gfp***

318 *E. coli* expressing *PrecA-gfp*, which encodes green fluorescent protein (*gfp*) under control  
319 of the *recA* promoter (66), was purchased from Dharmacon (Lafayette, CO). The plasmid was  
320 transformed into *E. coli* W3110 $\Delta\text{tolC}$ . The *tolC* deletion reduces the potential efflux of *recA*-  
321 activating molecules. W3110 $\Delta\text{tolC}$  *PrecA-gfp* and commensal strains were individually grown

322 overnight with shaking at 37°C. LB agar (2.5 ml) was added to 6-well plates and allowed to  
323 solidify. W3110 $\Delta$ *tolC* *PrecA-gfp* and one commensal strain were each diluted to a final OD<sub>600</sub> of  
324 0.05 in LB broth, and 1ml was added to the 6-well plates. The negative control included only  
325 W3110 $\Delta$ *tolC* *PrecA-gfp* at a final OD of 0.05 in 1 ml LB broth. The plates were statically  
326 incubated at 37°C. After 16 hr, 100  $\mu$ l was removed from each well, added to black 96 well clear  
327 bottom plates (Dot Scientific Inc., Burton, MI) and optical density (OD<sub>620</sub>) was read using a  
328 DU®730 spectrophotometer. Relative fluorescence units (RFU) were measured at an excitation  
329 of 485 nm and emission of 538 nm on a Fluoroskan Ascent FL (Thermo Fisher Scientific,  
330 Waltham, MA) (67). RFU values were normalized to cell density.

### 331 **One step recombination for *E. coli* knockouts**

332 Mutants of 0.1229 and MG1655 were constructed using one-step recombination (68).  
333 Primers contained either 50 bp upstream or downstream of the gene of interest, followed by  
334 sequences annealing to the P1 and P2 priming sites from pKD3. PCR was performed at the  
335 following settings: initial denaturation at 95°C for 30s; 10 cycles of 95°C 30s, 49°C 60s, 68°C  
336 100s; 24 cycles of 95°C 30s, T<sub>a</sub> 60s, 68° at variable time, and a final extension at 68°C for 5min.  
337 T<sub>a</sub> and variable times for each set of primers are reported in Table 1. A derivative of pKD46-  
338 Kan<sup>R</sup> was used as 0.1229 is resistant to Amp<sup>R</sup>. Electroporation was used to construct *E. coli*  
339 0.1229(pKD46) and MG1655(pKD46), using a Bio-Rad Gene Pulser II and following protocols  
340 recommended by the manufacturer. Colonies containing pKD46-Kan<sup>R</sup> were selected on LB  
341 plates with kanamycin. Strains containing pKD46 were grown to an OD<sub>600</sub> of 0.3, and L-  
342 arabinose was added to a final concentration of 0.2M. After incubation for 1 hr, cells were  
343 washed and electroporated with the pKD3-derived PCR product. Transformants were selected on  
344 LB plates with chloramphenicol. Knockouts were confirmed by PCR using primers ~200bp

345 upstream and downstream of the gene, using standard PCR settings (initial denaturation at 95°C  
346 for 30s; 35 cycles of 95°C 30s, variable amplification temperature ( $T_a$ ) 60s, 68°C at variable  
347 time; and a final extension at 68°C for 5min). This strategy was followed for all the knockouts,  
348 including primers and temperatures specific for each gene (Table 1).

### 349 **Gibson cloning**

350 The 2745-7950 bp region of p0.1229\_3 was cloned into pBR322  
351 (pBR322::p0.1229\_3<sup>2745-7950</sup>), using Gibson cloning as previously described (69). Briefly, primer  
352 pairs were constructed containing 30 bp annealing to the pBR322 insert site and 30 bp that would  
353 anneal to p0.1229\_3. DNA from 0.1229 and pBR322 was amplified at these sites using standard  
354 PCR settings, amplicons were cleaned up using a PCR purification kit (Qiagen, Germantown,  
355 MD) and subjected to assembly at 50°C using the Gibson cloning kit (New England Biosciences,  
356 Ipswich, MA). Assembled plasmids were propagated in DH5 $\alpha$  competent cells (New England  
357 Biosciences, Ipswich, MA). Verification PCR was performed using primers 200 bp upstream and  
358 downstream of the insert site (Table 1) and confirmed using Sanger sequencing. Successful  
359 constructs were transformed into C600 electrocompetent cells. A similar process was used to  
360 clone *tolC* in pBAD18 (Kan<sup>R</sup>).

### 361 **Whole genome sequencing and bioinformatics**

362 For the whole genome sequencing of 0.1229, genomic DNA was isolated using the  
363 Wizard Genomic DNA purification kit (Promega, Madison, WI). Whole genome sequencing was  
364 performed at the Penn State Genomics Core facility using the Illumina MiSeq platform. A PCR-  
365 free DNA kit was used for library preparation. The sequencing run produced 2 x 150 bp reads.

366 For the whole genome sequencing of 99.0750, 91.0593, and 90.2723, genomic DNA was  
367 isolated using Qiagen DNeasy Blood and Tissue Kit (Qiagen Inc., Germantown, MD). Whole



368 genome sequencing was performed using the NexTera XT DNA library prep kit and run on an  
369 Illumina MiSeq platform. The sequencing run produced 2 x 250 bp reads.

370 After Illumina sequencing, Fastq files were checked using Fastqc v0.11.5 (70) and  
371 assembled using SPAdes v3.10 (71). SPAdes assemblies were subjected to the Quality  
372 Assessment Tool for Genome Assemblies v4.5 (QUAST) (72), and contig number, genome size,  
373 N50 and GC % were noted.

374 Strain 0.1229 was also sequenced at the Center for Food Safety and Nutrition, Food and  
375 Drug Administration using the Pacific Biosciences (PacBio) RS II sequencing platform, as  
376 previously reported (73). For library preparation, 10 µg genomic DNA was sheared to 20 kb  
377 fragments by g-tubes (Covaris, Inc., Woburn, MA, USA) according to the manufacturer's  
378 instructions. The SMRTbell 20 kb template library was constructed using DNA Template Prep  
379 kit 1.0 (Pacific Biosciences, Menlo Park, CA, USA). BluePippin (Sage Science, Beverly, MA,  
380 USA) was used for size selection, and sequencing was performed using the P6/C4 chemistry on  
381 two single-molecule real-time (SMRT) cells with a 240 min collection protocol along with stage  
382 start. SMRT Analysis 2.3.0 was used for read analysis, and de novo assembly using the PacBio  
383 Hierarchical Genome Assembly Process (HGAP3.0) program. The assembly output from HGAP  
384 contained overlapping regions at the end which can be identified using dot plots in Gepard (74).  
385 The genome was checked manually for even sequencing coverage. Afterwards, the improved  
386 consensus sequence was uploaded in SMRT Analysis 2.3.0 to determine the final consensus and  
387 accuracy scores using Quiver consensus algorithm (75). The assembled genome was annotated  
388 using the NCBI's Prokaryotic Genomes Automatic Annotation Pipeline (PGAAP) (76).

389 Plasmid sequences were visualized using Blast Ring Image Generator v0.95 (BRIG) (77).  
390 The Center for Genomic Epidemiology website was used for ResFinder v3.1.0 (90% identity,

391 60% length) (78), SerotypeFinder v2.0.1 (85% identity, 60% length) (79) and MLSTFinder  
392 v2.0.1 (80) using the Achtman multi-locus sequence typing (MLST) scheme (81). The Integrated  
393 Microbial Genomics & Microbiomes website of DOE's Joint Genome Institute was utilized to  
394 BLAST the amino acid sequence of Hp1 against other genomes, matches that were between 36  
395 and 68% identical from varying species were selected, then visualized using the gene  
396 neighborhoods function (82).

### 397 **Data Analysis**

398 MS Excel (Microsoft Corporation, Albuquerque NM) was used to calculate the mean,  
399 standard deviation, and standard error; and GraphPad Prism 6 (GraphPad Software, San Diego  
400 CA) was used for generating figures. Error bars report standard error of the mean from at least  
401 three biological replicates.

### 402 **Data availability**

403 Nucleotide and SRA files for the 0.1229 can be found on NCBI under Biosample  
404 SAMN08737532. SRA files for 99.0750 (SAMN11457477), 91.0593 (SAMN11457478),  
405 90.2723 (SAMN11457479) can be found under their respective accession numbers.

406

### 407 **Acknowledgements**

408 We thank Dr. Craig Stephens at Santa Clara University for providing strain SF-173, Dr. Roberto  
409 Kolter at Harvard Medical School for providing strain ZK1526, and Erin Nawrocki for  
410 manuscript proofreading. HF was supported by USDA National Needs Grant 2014-38420-21822.  
411 This work was supported by grant number 1 R21 AI130856-01A1 through the National Institute  
412 of Allergy and Infectious Diseases and the USDA National Institute of Food and Agriculture  
413 Federal Appropriations under project PEN04522 and accession number 0233376.

414

415 **References**

- 416 1. Griffin PM, Tauxe R V. 1991. The Epidemiology of Infections Caused by *Escherichia*  
417 *coli* O157:H7, Other Enterohemorrhagic *E. coli*, and the Associated Hemolytic Uremic  
418 Syndrome. *Epidemiol Rev* 13:60–98.
- 419 2. Nguyen Y, Sperandio V, Padola NL, Starai VJ. 2012. Enterohemorrhagic *E. coli* (EHEC)  
420 pathogenesis. *Front Cell Infect Microbiol* 2:1–7.
- 421 3. Hayashi T, Makino K, Ohnishi M, Kurokawa K, Ishii K, Yokoyama K, Han C-G, Ohtsubo  
422 E, Nakayama K, Murata T, Tanaka M, Tobe T, Iida T, Takami H, Honda T, Sasakawa C,  
423 Ogasawara N, Yasunaga T, Kuhara S, Shiba T, Hattori M, Shinagawa H. 2001. Complete  
424 Genome Sequence of Enterohemorrhagic *Escherichia coli* O157:H7 and Genomic  
425 Comparison with a Laboratory Strain K-12. *DNA Res* 8:11–22.
- 426 4. Waldor MK, Friedman DI. 2005. Phage Regulatory Circuits and Virulence Gene  
427 Expression. *Curr Opin Microbiol* 8:459–465.
- 428 5. Zhang X, McDaniel AD, Wolf LE, Keusch GT, Waldor MK, Acheson DW. 2000.  
429 Quinolone Antibiotics induce Shiga toxin-encoding Bacteriophages, Toxin production,  
430 and Death in Mice. *J Infect Dis* 181:664–670.
- 431 6. Scotland S, Smith HR, Rowe B. 1985. Two Distinct Toxins active on Vero cells from  
432 *Escherichia coli* O157. *Lancet* 2:885–886.
- 433 7. Scheutz F, Teel LD, Beutin L, Piérard D, Buvens G, Karch H, Mellmann A, Caprioli A,  
434 Tozzoli R, Morabito S, Strockbine NA, Melton-Celsa AR, Sanchez M, Persson S, O'Brien  
435 AD. 2012. Multicenter Evaluation of a Sequence-based Protocol for Subtyping Shiga  
436 toxins and Standardizing Stx Nomenclature. *J Clin Microbiol* 50:2951–2963.

- 437 8. Bai X, Fu S, Zhang J, Fan R, Xu Y, Sun H, He X, Xu J, Xiong Y. 2018. Identification and  
438 Pathogenomic Analysis of an *Escherichia coli* Strain Producing a Novel Shiga toxin 2  
439 Subtype. *Sci Rep* 8:1–11.
- 440 9. FAO/WHO STEC Expert Group. 2018. Hazard Identification and Characterization:  
441 Criteria for Categorizing Shiga Toxin–Producing *Escherichia coli* on a Risk Basis. *J Food*  
442 *Prot* 82:7–21.
- 443 10. Strockbine NA, Marques LR, Newland JW, Smith HW, Holmes RK, O’Brien AD. 1986.  
444 Two toxin-converting Phages from *Escherichia coli* O157:H7 strain 933 encode  
445 Antigenically Distinct Toxins with Similar Biologic Activities. *Infect Immun* 53:135–140.
- 446 11. Matsushiro A, Sato K, Miyamoto H, Yamamura T, Honda T. 1999. Induction of  
447 Prophages of Enterohemorrhagic *Escherichia coli* O157:H7 with Norfloxacin. *J Bacteriol*  
448 181:2257–2260.
- 449 12. Ostroff S, Tarr P, Neill MA, Lewi JH, Hargrett-Bean N, Ostroff S, Tarr P, Neill MA, Lewi  
450 JH, Kobayashi JM. 1989. Toxin Genotypes and Plasmid Profiles as Determinants of  
451 Systemic Sequelae in *Escherichia coli* O157:H7 Infections. *J Infect Dis* 160:994–998.
- 452 13. Donohue-Rolfe A, Kondova I, Oswald S, Hutto D, Tzipori S. 2000. *Escherichia coli*  
453 O157:H7 Strains That Express Shiga Toxin (Stx) 2 Alone Are More Neurotropic for  
454 Gnotobiotic Piglets Than Are Isotypes Producing Only Stx1 or Both Stx1 and Stx2. *J*  
455 *Infect Dis* 181:1825–1829.
- 456 14. Orth D, Grif K, Khan AB, Naim A, Dierich MP, Würzner R. 2007. The Shiga toxin  
457 Genotype Rather than the Amount of Shiga toxin or the Cytotoxicity of Shiga toxin *in*  
458 *vitro* Correlates with the Appearance of the Hemolytic Uremic Syndrome. *Diagn*  
459 *Microbiol Infect Dis* 59:235–242.

- 460 15. Persson S, Olsen KEP, Ethelberg S, Scheutz F. 2007. Subtyping Method for *Escherichia*  
461 *coli* Shiga Toxin (Verocytotoxin) 2 Variants and Correlations to Clinical Manifestations. J  
462 Clin Microbiol 45:2020–2024.
- 463 16. Shringi S, Schmidt C, Katherine K, Brayton KA, Hancock DD, Besser TE. 2012. Carriage  
464 of *stx2a* Differentiates Clinical and Bovine-Biased Strains of *Escherichia coli* O157. PLoS  
465 One 7:e51572.
- 466 17. Kawano K, Okada M, Haga T, Maeda K, Goto Y. 2008. Relationship between  
467 Pathogenicity for Humans and *stx* Genotype in Shiga toxin-Producing *Escherichia coli*  
468 Serotype O157. Eur J Clin Microbiol Infect Dis 27:227–232.
- 469 18. FAO/WHO. 2018. Shiga toxin-producing *Escherichia coli* (STEC) and Food: Attribution,  
470 Characterization, and Monitoring. Rome.
- 471 19. Carey CM, Kostrzynska M, Ojha S, Thompson S. 2008. The Effect of Probiotics and  
472 Organic Acids on Shiga-toxin 2 Gene Expression in Enterohemorrhagic *Escherichia coli*  
473 O157:H7. J Microbiol Methods 73:125–132.
- 474 20. Thévenot J, Cordonnier C, Rougeron A, Le Goff O, Nguyen HTT, Denis S, Alric M,  
475 Livrelli V, Blanquet-Diot S. 2015. Enterohemorrhagic *Escherichia coli* Infection has  
476 Donor-dependent Effect on Human Gut Microbiota and May be Antagonized by Probiotic  
477 Yeast during Interaction with Peyer’s Patches. Appl Microb Cell Physiol 99:9097–9110.
- 478 21. de Sablet T, Chassard C, Bernalier-Donadille A, Vareille M, Gobert AP, Martin C. 2009.  
479 Human Microbiota-Secreted Factors Inhibit Shiga Toxin synthesis by Enterohemorrhagic  
480 *Escherichia coli* O157:H7. Infect Immun 77:783–790.
- 481 22. Gamage SD, Strasser JE, Chalk CL, Weiss AA. 2003. Nonpathogenic *Escherichia coli*  
482 Can Contribute to the Production of Shiga Toxin. Infect Immun 71:3107–3115.

- 483 23. Goswami K, Chen C, Xiaoli L, Eaton KA, Dudley EG. 2015. Coculture of *Escherichia*  
484 *coli* O157:H7 with a Nonpathogenic *E. coli* Strain Increases Toxin Production and  
485 Virulence in a Germfree Mouse Model. *Infect Immun* 83:4185–4193.
- 486 24. Xiaoli L, Figler HM, Goswami K, Dudley EG. 2018. Nonpathogenic *E. coli* Enhance  
487 Stx2a Production of *E. coli* O157:H7 through bamA-Dependent and Independent  
488 Mechanisms. *Front Microbiol* 9:1–13.
- 489 25. Smith DL, James CE, Sergeant MJ, Yaxian Y, Saunders JR, McCarthy AJ, Allison HE.  
490 2007. Short-tailed stx phages Exploit the Conserved YaeT Protein to Disseminate Shiga  
491 Toxin Genes Among Enterobacteria. *J Bacteriol* 189:7223–7233.
- 492 26. Toshima H, Yoshimura A, Arikawa K, Hidaka A, Ogasawara J, Hase A, Masaki H,  
493 Nishikawa Y. 2007. Enhancement of Shiga Toxin Production in Enterohemorrhagic  
494 *Escherichia coli* Serotype O157:H7 by DNase Colicins. *Appl Environ Microbiol*  
495 73:7582–7588.
- 496 27. Mobley HLT, Green DM, Trifillis AL, Johnson DE, Chippendale GR, Lockett CV,  
497 Jones BD, Warren JW. 1990. Pyelonephritogenic *Escherichia coli* and Killing of Cultured  
498 Human Renal Proximal Tubular Epithelial Cells: Role of Hemolysin in Some Strains.  
499 *Infect Immun* 58:1281–1289.
- 500 28. Nissle A. 1919. Weiteres über die Mutaflorbehandlung unter besonderer Berü  
501 cksichtigung der chronischen Ruhr. *Münchener Medizinische Wochenschrift* 25:678–681.
- 502 29. Wijetunge DSS, Karunathilake KHEM, Chaudhari A, Katani R, Dudley EG, Kapur V,  
503 DebRoy C, Kariyawasam S. 2014. Complete Nucleotide Sequence of pRS218, a Large  
504 Virulence Plasmid, that Augments Pathogenic Potential of Meningitis-associated  
505 *Escherichia coli* Strain RS218. *BMC Microbiol* 14:1–16.

- 506 30. Chen SL, Hung C-S, Xu J, Reigstad CS, Magrini V, Sabo A, Blasiar D, Bieri T, Meye RR,  
507 Ozersky P, Armstrong JR, Fulton RS, Latreille JP, Spieth J, Hooton TM, Mardis ER,  
508 Hultgren SJ, Gordon JI. 2006. Identification of Genes Subject to Positive Selection in  
509 Uropathogenic Strains of *Escherichia coli*: A Comparative Genomics Approach. PNAS  
510 103:5977–5982.
- 511 31. Davagnino J, Herrero M, Furlong D, Moreno F, Kolter R. 1986. The DNA Replication  
512 Inhibitor Microcin B17 is a Forty-three-amino-acid Protein Containing Sixty Percent  
513 Glycine. Proteins Struct Funct Genet 1:230–238.
- 514 32. Stephens CM, Skerker CM, Sekhon JM, Arkin MS, Riley AP. 2015. Complete Genome  
515 Sequences of Four *Escherichia coli* ST95 Isolates from Bloodstream Infections. Genome  
516 Announc 3:1241–1256.
- 517 33. Künne C, Billion A, Mshana SE, Schmiedel J, Domann E, Hossain H, Hain T,  
518 Imirzalioglu C, Chakraborty T. 2011. Complete Sequences of Plasmids from the  
519 Hemolytic-uremic Syndrome-associated *Escherichia coli* strain HUSEC41. J Bacteriol  
520 194:532–533.
- 521 34. Thompson RE, Collin F, Maxwell A, Jolliffe KA, Payne RJ. 2014. Synthesis of Full  
522 Length and Truncated Microcin B17 Analogues as DNA Gyrase Poisons. Org Biomol  
523 Chem 12:1570–1578.
- 524 35. Delgado MA, Solbiati JO, Chiuchiolo MJ, Farías RN, Salomón RA. 1999. *Escherichia*  
525 *coli* Outer Membrane Protein TolC is Involved in Production of the Peptide Antibiotic  
526 Microcin J25. J Bacteriol 181:1968–1970.
- 527 36. Braun V, Patzer SI, Hantke K. 2002. Ton-dependent Colicins and Microcins: Modular  
528 Design and Evolution. Biochimie 84:365–380.

- 529 37. Penders J, Thijs C, Vink C, Stelma FF, Snijders B, Kummeling I, van den Brandt PA,  
530 Stobberingh EE. 2006. Factors Influencing the Composition of the Intestinal Microbiota in  
531 Early Infancy. *Pediatrics* 118:511–521.
- 532 38. Slanetz LW, Bartley CH. 1957. Numbers of Enterococci in Water, Sewage, and Feces  
533 determined by the Membrane Filter Technique with an improved medium. *J Bacteriol*  
534 74:591–595.
- 535 39. Apperloo-renkema HZ, Van Der Waaij BD, Van Der Waaij D. 1990. Determination of  
536 Colonization Resistance of the Digestive Tract by Biotyping of Enterobacteriaceae.  
537 *Epidemiol Infect* 105:355–361.
- 538 40. Johnson JR, Owens K, Gajewski A, Clabots C. 2008. *Escherichia coli* Colonization  
539 Patterns among Human Household Members and Pets, with Attention to Acute Urinary  
540 Tract Infection. *J Infect Dis* 197:218–224.
- 541 41. Leatham MP, Banerjee S, Autieri SM, Conway T, Cohen PS, Mercado-lubo R. 2009.  
542 Precolonized Human Commensal *Escherichia coli* Strains Serve as a Barrier to *E. coli*  
543 O157 : H7 Growth in the Streptomycin-Treated Mouse Intestine. *Infect Immun* 77:2876–  
544 2886.
- 545 42. Sperandio V, Mellies JL, Nguyen W, Shin S, Kaper JB. 1999. Quorum Sensing Controls  
546 Expression of the Type III Secretion Gene Transcription and Protein Secretion in  
547 Enterohemorrhagic and Enteropathogenic *Escherichia coli*. *Proc Natl Acad Sci U S A*  
548 96:15196–15201.
- 549 43. Sperandio V, Torres AG, Gir N JA, Kaper JB. 2001. Quorum Sensing Is a Global  
550 Regulatory Mechanism in Enterohemorrhagic *Escherichia coli* O157:H7. *J Bacteriol*  
551 183:5187–5197.



- 552 44. Zhao T, Doyle MP, Harmon BG, Brown CA, Mueller PO, Parks AH. 1998. Reduction of  
553 Carriage of Enterohemorrhagic *Escherichia coli* O157:H7 in Cattle by Inoculation with  
554 Probiotic Bacteria. *J Clin Microbiol* 36:641–647.
- 555 45. Bell BP, Griffin PM, Lozano P, Christie DL, Kobayashi JM, Tarr PI. 1997. Predictors of  
556 Hemolytic Uremic Syndrome in Children During a Large Outbreak of *Escherichia coli*  
557 O157:H7 Infections. *Pediatrics* 100:1–6.
- 558 46. Gamage SD, Patton AK, Strasser JE, Chalk CL, Weiss AA. 2006. Commensal Bacteria  
559 Influence *Escherichia coli* O157:H7 Persistence and Shiga toxin Production in the Mouse  
560 Intestine. *Infect Immun* 74:1977–1983.
- 561 47. Amigo N, Mercado E, Bentancor A, Singh P, Vilte D, Gerhardt E, Zotta E, Ibarra C,  
562 Manning SD, Larzábal M, Cataldi A. 2015. Clade 8 and Clade 6 Strains of *Escherichia*  
563 *coli* O157:H7 from Cattle in Argentina have Hypervirulent-Like Phenotypes. *PLoS One*  
564 10:e0127710.
- 565 48. Micenková L. 2016. PhD Thesis. Bacteriocinogeny in pathogenic and commensal  
566 *Escherichia coli* strains. Masarykova Univerzita Lékařská Fakulta Biologický Ústav.
- 567 49. Bielaszewska M, Idelevich EA, Zhang W, Bauwens A, Schaumburg F, Mellmann A,  
568 Peters G, Karch H. 2012. Effects of Antibiotics on Shiga toxin 2 Production and  
569 Bacteriophage Induction by Epidemic *Escherichia coli* O104:H4 Strain. *Antimicrob*  
570 *Agents Chemother* 56:3277–3282.
- 571 50. Łoś JM, Łoś M, Węgrzyn A, Węgrzyn G. 2010. Hydrogen Peroxide-mediated Induction  
572 of the Shiga Toxin Converting Lambdoid Prophage ST2-8624 in *Escherichia coli*  
573 O157:H7. *FEMS Immunol Med Microbiol* 58:322–329.
- 574 51. Cascales E, Buchanan SK, Duche D, Kleanthous C, Lloubes R, Postle K, Riley M, Slatin

- 575 S, Cavard D. 2007. Colicin Biology. *Microbiol Mol Biol Rev* 71:158–229.
- 576 52. Duquesne S, Destoumieux-Garzón D, Peduzzi J, Rebuffat S. 2007. Microcins, Gene-  
577 encoded Antibacterial Peptides from Enterobacteria. *R Soc Chem* 24:708–734.
- 578 53. Patzer SI, Baquero MR, Bravo D, Moreno F, Hantke K. 2003. The Colicin G, H and X  
579 Determinants Encode Microcins M and H47, which Might Utilize the Catecholate  
580 Siderophore Receptors FepA, Cir, Fiu and IronN. *Microbiology* 149:2557–2570.
- 581 54. Gilson L, Mahanty K, Kolter R. 1987. Four Plasmid Genes Are Required for Colicin V  
582 Synthesis, Export, and Immunity. *J Bacteriol* 169:2466–2470.
- 583 55. Chehade H, Braun V. 1988. Iron-regulated Synthesis and Uptake of Colicin V. *FEMS*  
584 *Microbiol Lett* 52:177–181.
- 585 56. Corsini G, Karahanian E, Tello M, Fernandez K, Rivero D, Saavedra JM, Ferrer A. 2010.  
586 Purification and Characterization of the Antimicrobial Peptide Microcin N. *FEMS*  
587 *Microbiol Lett* 312:119–125.
- 588 57. Morin N, Lanneluc I, Connil N, Cottenceau M, Pons AM, Sablé S. 2011. Mechanism of  
589 Bactericidal Activity of Microcin L in *Escherichia coli* and *Salmonella enterica*.  
590 *Antimicrob Agents Chemother* 55:997–1007.
- 591 58. Eberhart LJ, Deringer JR, Brayton K a., Sawant A a., Besser TE, Call DR. 2012.  
592 Characterization of a Novel Microcin that Kills Enterohemorrhagic *Escherichia coli*  
593 O157:H7 and O26. *Appl Environ Microbiol* 78:6592–6599.
- 594 59. Zhao Z, Orfe LH, Liu J, Lu S-Y, Besser TE, Call DR. 2017. Microcin PDI Regulation and  
595 Proteolytic Cleavage are Unique Among Known Microcins. *Nat Publ Gr* 7:1–14.
- 596 60. Havarstein LS, Holo H, Nes IF. 1994. The Leader Peptide of Colicin V Shares Consensus  
597 Sequences with Leader Peptides that are Common Among Peptide Bacteriocins Produced

- 598 by Gram-positive Bacteria. *Microbiology* 140:2383–2389.
- 599 61. Havarstein LS, Diep DB, Nes IF. 1995. A Family of Bacteriocin ABC transporters Carry  
600 out Proteolytic Processing of their Substrates Concomitant with Export. *Mol Microbiol*  
601 16:229–240.
- 602 62. Yang CC, Konisky J. 1984. Colicin V-treated *Escherichia coli* Does Not Generate  
603 Membrane Potential. *J Bacteriol* 158:757–759.
- 604 63. Yuzenkova J, Delgado M, Nechaev S, Savalia D, Epshtein V, Artsimovitch I, Mooney  
605 RA, Landick R, Farias RN, Salomon R, Severinov K. 2002. Mutations of Bacterial RNA  
606 Polymerase Leading to Resistance to Microcin J25. *J Biol Chem* 277:50867–50875.
- 607 64. Gilson L, Mahanty HK, Kolter R. 1990. Genetic Analysis of an MDR-like Export System:  
608 The Secretion of Colicin V. *EMBO J* 9:3875–3884.
- 609 65. Hartzell A, Chen C, Lewis C, Liu K, Reynolds S, Dudley EG. 2011. *Escherichia coli*  
610 O157:H7 of Genotype Lineage-Specific Polymorphism Assay 211111 and Clade 8 Are  
611 Common Clinical Isolates Within Pennsylvania. *Foodborne Pathog Dis* 8:763–768.
- 612 66. Zaslaver A, Bren A, Ronen M, Itzkovitz S, Kikoin I, Shavit S, Liebermeister W, Surette  
613 MG, Alon U. 2006. A Comprehensive Library of Fluorescent Transcriptional Reporters  
614 for *Escherichia coli*. *Nat Methods* 3:623–628.
- 615 67. Fan J, de Jonge BLM, MacCormack K, Sriram S, McLaughlin RE, Plant H, Preston M,  
616 Fleming PR, Albert R, Foulk M, Mills SD. 2014. A Novel High-throughput Cell-based  
617 Assay Aimed at Identifying Inhibitors of DNA Metabolism in Bacteria. *Antimicrob*  
618 *Agents Chemother* 58:7264–7272.
- 619 68. Datsenko K, Wanner BL. 2000. One-step inactivation of chromosomal genes in  
620 *Escherichia coli* K-12 using PCR products. *Proc Natl Acad Sci U S A* 97:6640–6645.

- 621 69. Gibson DG, Young L, Chuang R-Y, Venter JC, Hutchison CA, Smith HO. 2009.  
622 Enzymatic Assembly of DNA Molecules up to Several Hundred Kilobases. *Nat Methods*  
623 6:343–345.
- 624 70. Andrews S. 2010. FastQC: A Quality Control Tool for High Throughput Sequence Data.  
625 Babraham Bioinformatics. <https://www.bioinformatics.babraham.ac.uk/projects/fastqc/>
- 626 71. Bankevich A, Nurk S, Antipov D, Gurevich AA, Dvorkin M, Kulikov AS, Lesin VM,  
627 Nikolenko SI, Pham S, Prjibelski AD, Pyshkin A V., Sirotkin A V., Vyahhi N, Tesler G,  
628 Alekseyev MA, Pevzner PA. 2012. SPAdes: A New Genome Assembly Algorithm and Its  
629 Applications to Single-Cell Sequencing. *J Comput Biol* 19:455–477.
- 630 72. Gurevich A, Saveliev V, Vyahhi N, Tesler G. 2013. QUILT: Quality Assessment Tool  
631 for Genome Assemblies. *Bioinformatics* 29:1072–1075.
- 632 73. Yao K, Roberts RJ, Allard MW, Hoffmann M. 2017. Complete Genome and Methylome  
633 Sequences of *Salmonella enterica* subsp. *enterica* Serovars Typhimurium, Saintpaul, and  
634 Stanleyville from the SARA/SARB Collection. *Genome Announc* 5:e00031-17.
- 635 74. Krumsiek J, Arnold R, Rattei T. 2007. Gepard: A Rapid and Sensitive Tool for Creating  
636 Dotplots on Genome Scale. *Bioinformatics* 23:1026–1028.
- 637 75. Chin C-S, Alexander DH, Marks P, Klammer AA, Drake J, Heiner C, Clum A, Copeland  
638 A, Huddleston J, Eichler EE, Turner SW, Korlach J. 2013. Nonhybrid, Finished Microbial  
639 Genome Assemblies from Long-read SMRT Sequencing Data. *Nat Methods* 10:563–569.
- 640 76. Klimke W, Agarwala R, Badretdin A, Chetvernin S, Ciufu S, Fedorov B, Kiryutin B,  
641 O’Neill K, Resch W, Resenchuk S, Schafer S, Tolstoy I, Tatusova T. 2009. The National  
642 Center for Biotechnology Information’s Protein Clusters Database. *Nucleic Acids Res*  
643 37:D216–D223.

- 644 77. Alikhan N-F, Petty NK, Ben Zakour NL, Beatson SA. 2011. BLAST Ring Image  
645 Generator (BRIG): Simple Prokaryote Genome Comparisons. *BMC Genomics* 12:1–10.
- 646 78. Zankari E, Hasman H, Cosentino S, Vestergaard M, Rasmussen S, Lund O, Aarestrup FM,  
647 Larsen MV. 2012. Identification of Acquired Antimicrobial Resistance Genes. *J*  
648 *Antimicrob Chemother* 67:2640–2644.
- 649 79. Joensen KG, Tetzschner AMM, Iguchi A, Aarestrup FM, Scheutz F. 2015. Rapid and  
650 Easy In Silico Serotyping of *Escherichia coli* Isolates by Use of Whole-Genome  
651 Sequencing Data. *J Clin Microbiol* 53:2410–2426.
- 652 80. Larsen M V, Cosentino S, Rasmussen S, Friis C, Hasman H, Marvig RL, Jelsbak L,  
653 Sicheritz-Pontén T, Ussery DW, Aarestrup FM, Lund O. 2012. Multilocus Sequence  
654 Typing of Total-genome-sequenced Bacteria. *J Clin Microbiol* 50:1355–1361.
- 655 81. Wirth T, Falush D, Lan R, Colles F, Mensa P, Wieler LH, Karch H, Reeves PR, Maiden  
656 MCJ, Ochman H, Achtman M. 2006. Sex and Virulence in *Escherichia coli*: An  
657 Evolutionary Perspective. *Mol Microbiol* 60:1136–1151.
- 658 82. Chen I-MA, Chu K, Palaniappan K, Pillay M, Ratner A, Huang J, Huntemann M,  
659 Varghese N, White JR, Seshadri R, Smirnova T, Kirton E, Jungbluth SP, Woyke T, Eloe-  
660 Fadrosch EA, Ivanova NN, Kyrpides NC. 2019. IMG/M v.5.0: An Integrated Data  
661 Management and Comparative Analysis System for Microbial Genomes and  
662 Microbiomes. *Nucleic Acids Res* 47:D666–D677.
- 663 83. Riley LW, Remis RS, Helgerson SD, McGee HB, Wells JG, Davis BR, Hebert RJ, Olcott  
664 ES, Johnson LM, Hargrett NT, Blake PA, Cohen ML. 1983. Hemorrhagic Colitis  
665 Associated with a Rare *Escherichia coli* Serotype. *N Engl J Med* 308:681–685.
- 666 84. Appleyard RK. 1954. Segregation of New Lysogenic Types During Growth of a Doubly

- 667 Lysogenic Strain Derived from *Escherichia coli* K12. *Genetics* 39:440–452.
- 668 85. Blattner FR, Plunkett G, Bloch CA, Perna NT, Burland V, Riley M, Collado-Vides J,  
669 Glasner JD, Rode CK, Mayhew GF, Gregor J, Davis NW, Kirkpatrick HA, Goeden MA,  
670 Rose DJ, Mau B, Shao Y. 1997. The complete genome sequence of *Escherichia coli* K-12.  
671 *Science* (80) 277:1453–1462.
- 672 86. Achtman M, Mercer A, Kusecek B, Pohl A, Heuzenroeder M, Aaronson W, Sutton A,  
673 Silver RP. 1983. Six widespread bacterial clones among *Escherichia coli* K1 isolates.  
674 *Infect Immun* 39:315–35.
- 675 87. Yorgey P, Lee J, Kördel J, Vivas E, Warner P, Jebaratnam D, Kolter R. 1994.  
676 Posttranslational modifications in microcin B17 define an additional class of DNA gyrase  
677 inhibitor. *Proc Natl Acad Sci U S A* 91:4519–4523.
- 678 88. Guzman L-M, Belin D, Carson MJ, Beckwith J. 1995. Tight Regulation, Modulation, and  
679 High-Level Expression by Vectors Containing the Arabinose pBAD Promoter. *J Bacteriol.*  
680 177(14):4121-4130.
- 681 89. Larsen RA, Thomas MG, Postle K. 1999. Protonmotive force, ExbB and ligand-bound  
682 FepA drive conformational changes in TonB. *Mol Microbiol* 31:1809–1824.
- 683 90. Bolivar F, Rodriguez RL, Greene PJ, Betlach MC, Heyneker HL, Boyer HW, Crosa JH,  
684 Falkow S. 1977. Construction and characterization of new cloning vehicle. II. A  
685 multipurpose cloning system. *Gene* 2:95–113.

686

687

688

689

## 690 Figure Legends

691 Table 1: Bacterial isolates, plasmids and primers used in this study

| <i>E. coli</i> strains                           | Characteristic(s)                                                                           | Reference                                                           |            |
|--------------------------------------------------|---------------------------------------------------------------------------------------------|---------------------------------------------------------------------|------------|
| PA2                                              | <i>stx2a</i> ; O157:H7; Pennsylvania                                                        | (65)                                                                |            |
| PA8                                              | <i>stx2a</i> ; O157:H7; Pennsylvania                                                        | (65)                                                                |            |
| EDL933                                           | <i>stx2a</i> , <i>stx1a</i> ; O157:H7                                                       | (83)                                                                |            |
| C600                                             | K12 derivative                                                                              | (84)                                                                |            |
| MG1655                                           | K12 derivative                                                                              | (85)                                                                |            |
| 1.0484                                           | A phylogroup; O147; Minnesota                                                               | ECRC                                                                |            |
| 0.1229                                           | B2 phylogroup; O18:H1; Amp <sup>R</sup> Tet <sup>R</sup> ; ST73; California                 | ECRC                                                                |            |
| 1.0342                                           | D phylogroup; O11; Minnesota                                                                | ECRC                                                                |            |
| 1.1967                                           | B2 phylogroup; O21; Minnesota                                                               | ECRC                                                                |            |
| 1.0374                                           | D phylogroup; O77; Minnesota                                                                | ECRC                                                                |            |
| Nissle 1917                                      | Mutaflor; O6:H1; ST73                                                                       | (28)                                                                |            |
| CFT073                                           | UPEC; O6:H1; ST73                                                                           | (27)                                                                |            |
| RS218                                            | NMEC; O18:H7; ST95                                                                          | (86)                                                                |            |
| 99.0750                                          | O36:H39; Brazil                                                                             | ECRC                                                                |            |
| 91.0593                                          | O?:H10; Mexico                                                                              | ECRC                                                                |            |
| 90.2723                                          | O?:H12; New York                                                                            | ECRC                                                                |            |
| ZK1526                                           | microcin B17 producing strain; W3110 $\Delta$ <i>lacU169 tna-2</i> pPY113; Amp <sup>R</sup> | (87)                                                                |            |
| Derivatives                                      | Characteristic(s)                                                                           | Antibiotic resistance                                               | Reference  |
| 0.1229 $\Delta$ <i>mcbA</i>                      | 0.1229 $\Delta$ <i>mcbA</i> :: <i>cat</i>                                                   | Cat <sup>R</sup> Amp <sup>R</sup> Tet <sup>R</sup>                  | This study |
| 0.1229 $\Delta$ <i>mcbABCDEFG</i>                | 0.1229 $\Delta$ <i>mcbABCDEFG</i> :: <i>cat</i>                                             | Cat <sup>R</sup> Amp <sup>R</sup> Tet <sup>R</sup>                  | This study |
| 0.1229 $\Delta$ 6                                | 0.1229 $\Delta$ p0.1229_3 <sup>2850-5473</sup> :: <i>cat</i>                                | Cat <sup>R</sup> Amp <sup>R</sup> Tet <sup>R</sup>                  | This study |
| 0.1229 $\Delta$ 7                                | 0.1229 $\Delta$ p0.1229_3 <sup>5426-7950</sup> :: <i>cat</i>                                | Cat <sup>R</sup> Amp <sup>R</sup> Tet <sup>R</sup>                  | This study |
| 0.1229 $\Delta$ 8                                | 0.1229 $\Delta$ p0.1229_3 <sup>8001-9950</sup> :: <i>cat</i>                                | Cat <sup>R</sup> Amp <sup>R</sup> Tet <sup>R</sup>                  | This study |
| 0.1229 $\Delta$ <i>hpl1</i>                      | 0.1229 $\Delta$ p0.1229_3 <sup>3084-3792</sup> :: <i>cat</i>                                | Cat <sup>R</sup> Amp <sup>R</sup> Tet <sup>R</sup>                  | This study |
| 0.1229 $\Delta$ ABC                              | 0.1229 $\Delta$ p0.1229_3 <sup>3831-5423</sup> :: <i>cat</i>                                | Cat <sup>R</sup> Amp <sup>R</sup> Tet <sup>R</sup>                  | This study |
| 0.1229 $\Delta$ <i>cupin</i>                     | 0.1229 $\Delta$ p0.1229_3 <sup>5426-6319</sup> :: <i>cat</i>                                | Cat <sup>R</sup> Amp <sup>R</sup> Tet <sup>R</sup>                  | This study |
| 0.1229 $\Delta$ DUF4440                          | 0.1229 $\Delta$ p0.1229_3 <sup>6706-6344</sup> :: <i>cat</i>                                | Cat <sup>R</sup> Amp <sup>R</sup> Tet <sup>R</sup>                  | This study |
| 0.1229 $\Delta$ DUF2164                          | 0.1229 $\Delta$ p0.1229_3 <sup>6942-6703</sup> :: <i>cat</i>                                | Cat <sup>R</sup> Amp <sup>R</sup> Tet <sup>R</sup>                  | This study |
| 0.1229 $\Delta$ <i>hpl2</i>                      | 0.1229 $\Delta$ p0.1229_3 <sup>7227-7048</sup> :: <i>cat</i>                                | Cat <sup>R</sup> Amp <sup>R</sup> Tet <sup>R</sup>                  | This study |
| 0.1229 $\Delta$ <i>hpl3</i>                      | 0.1229 $\Delta$ p0.1229_3 <sup>9099-7546</sup> :: <i>cat</i>                                | Cat <sup>R</sup> Amp <sup>R</sup> Tet <sup>R</sup>                  | This study |
| 0.1229 $\Delta$ <i>tolC</i>                      | 0.1229 $\Delta$ <i>tolC</i> :: <i>cat</i>                                                   | Cat <sup>R</sup> Amp <sup>R</sup> Tet <sup>R</sup>                  | This study |
| 0.1229 $\Delta$ <i>tolC</i> pBAD18:: <i>tolC</i> | 0.1229 $\Delta$ <i>tolC</i> :: <i>cat</i> + pBAD18:: <i>tolC</i>                            | Cat <sup>R</sup> Amp <sup>R</sup> Tet <sup>R</sup> Kan <sup>R</sup> | This study |
| 0.1229 $\Delta$ <i>tolC</i> pBAD18               | 0.1229 $\Delta$ <i>tolC</i> :: <i>cat</i> + pBAD18                                          | Cat <sup>R</sup> Amp <sup>R</sup> Tet <sup>R</sup> Kan <sup>R</sup> | This study |
| W3110 $\Delta$ <i>tolC</i> <i>PrecA-GFP</i>      | W3110 $\Delta$ <i>tolC</i> :: <i>tet</i> + <i>PrecA-GFP</i>                                 | Tet <sup>R</sup> Kan <sup>R</sup>                                   | (66)       |
| MG1655 <i>PrecA-GFP</i>                          | MG1655 <i>PrecA-GFP</i>                                                                     | Kan <sup>R</sup>                                                    | This study |

|                                                     |                                                                |                                                                            |                                     |
|-----------------------------------------------------|----------------------------------------------------------------|----------------------------------------------------------------------------|-------------------------------------|
| MG1655 $\Delta$ tonB <i>PrecA-GFP</i>               | MG1655 $\Delta$ tonB:: <i>cat</i> + <i>PrecA-GFP</i>           | Cat <sup>R</sup> Kan <sup>R</sup>                                          | This study                          |
| MG1655 $\Delta$ tonB <i>PrecA-GFP</i><br>pKP315     | MG1655 $\Delta$ tonB:: <i>cat</i> + <i>PrecA-GFP</i> + pKP315  | Cat <sup>R</sup> Kan <sup>R</sup> Amp <sup>R</sup>                         | This study                          |
| MG1655 $\Delta$ tonB <i>PrecA-GFP</i><br>pBAD24     | MG1655 $\Delta$ tonB:: <i>cat</i> + <i>PrecA-GFP</i> + pBAD24  | Cat <sup>R</sup> Kan <sup>R</sup> Amp <sup>R</sup>                         | This study                          |
| C600 pBR322::p0.1229_3 <sup>2745-7950</sup>         | C600 + pBR322::p0.1229_3 <sup>2745-7950</sup>                  | Tet <sup>R</sup>                                                           | This study                          |
| C600 pBR322                                         | C600 + pBR322                                                  | Amp <sup>R</sup> Tet <sup>R</sup>                                          | This study                          |
| C600 p0.1229_3                                      | C600 + p0.1229_3                                               | Amp <sup>R</sup>                                                           | This study                          |
| <b>Plasmids</b>                                     |                                                                |                                                                            |                                     |
|                                                     | <b>Characteristic(s)</b>                                       | <b>Antibiotic resistance</b>                                               | <b>Reference</b>                    |
| p0.1229_1                                           | 114kb plasmid of 0.1229                                        | None                                                                       | This study                          |
| p0.1229_2                                           | 96kb plasmid of 0.1229                                         | Tet <sup>R</sup>                                                           | This study                          |
| p0.1229_3                                           | 13kb plasmid of 0.1229                                         | Amp <sup>R</sup>                                                           | This study                          |
| pKD3                                                | pKD3                                                           | Cat <sup>R</sup> , Amp <sup>R</sup>                                        | (68)                                |
| pKD46-Kan <sup>R</sup>                              | pKD46; pCRISPR, P <sub>araC</sub> - $\lambda$ -red recombinase | Kan <sup>R</sup>                                                           | Nikki Shariat                       |
| <i>PrecA-GFP</i>                                    | pMSs201 + <i>PrecA-GFP</i>                                     | Kan <sup>R</sup>                                                           | (66)                                |
| pBAD24                                              | pBAD24; <i>araC</i>                                            | Amp <sup>R</sup>                                                           | (88)                                |
| pKP315                                              | pBAD24:: <i>tonB</i> ; P <sub>araC</sub>                       | Amp <sup>R</sup>                                                           | (89)                                |
| pBAD18                                              | pBAD18; P <sub>araC</sub>                                      | Kan <sup>R</sup>                                                           | (88)                                |
| pBAD18:: <i>tolC</i>                                | pBAD18:: <i>tolC</i> ; P <sub>araC</sub>                       | Kan <sup>R</sup>                                                           | This study                          |
| pBR322                                              | pBR322                                                         | Amp <sup>R</sup> , Tet <sup>R</sup>                                        | (90)                                |
| pBR322::hp1end7                                     | pBR322::p0.1229_3 <sup>2850-7950</sup>                         | Tet <sup>R</sup>                                                           | This study                          |
| <b>Primers</b>                                      |                                                                |                                                                            |                                     |
| <b>Experiment</b>                                   | <b>Primer Name</b>                                             | <b>Sequence</b>                                                            | <b>T<sub>a</sub>, variable time</b> |
| $\Delta$ <i>mcbA</i> & $\Delta$ <i>mcbABCDEFGHI</i> | mcbA-KF                                                        | atactattcagatgcataagcattaatttcccttaaaaaaggagtccttGTGTAGGCTGGAGC<br>TGCTTC  | 62°C, 100s                          |
|                                                     | mcbA-KR                                                        | tttttaatatcaggaggaccatgctcctgaacgggtaattcaacgtaCATATGAATATCCT<br>CCTTAG    |                                     |
| $\Delta$ <i>mcbA</i>                                | mcbA-VF                                                        | GGGGCTTAAAGGGGTAGTGT                                                       | 49°C, 45s                           |
|                                                     | mcbA-VR                                                        | AAGCGATTCGTCCAGTAGTTT                                                      |                                     |
| $\Delta$ <i>mcbABCDEFGHI</i>                        | mcbG-KR                                                        | gtccggttctgaggagggcccgtccgggcaaccggcgggtctactcaccCATATGAATAT<br>CCTCCTTAG  | 70.9°C, 2min                        |
|                                                     | mcbG-VR                                                        | CCTAACAACGCCACGACTTT                                                       | 49°C, 2min                          |
| $\Delta$ 6                                          | 6-KF                                                           | acacatttcgtacagcctttacactcgggtaattagcggccttagatgcaGTGTAGGCTGGAG<br>CTGCTTC | 67°C, 3min                          |
|                                                     | 6-KR                                                           | ttaaacctcatgtttgtgatctataatctgtgcttaggtatattatCATATGAATATCCTCC<br>TTAG     |                                     |
|                                                     | 6-VF                                                           | GAAGATATCGCACGCCTCTC                                                       | 54.5°C, 3min                        |
|                                                     | 6-VR                                                           | CGCCTGTTTGGCTATATGTG                                                       |                                     |
| $\Delta$ 7                                          | 7-KF                                                           | aatatacctaaagcacagattatagatatacacaacatgaggttataaaGTGTAGGCTGGAG<br>CTGCTTC  | 70°C, 90s                           |



|                                        |                     |                                                                           |                   |
|----------------------------------------|---------------------|---------------------------------------------------------------------------|-------------------|
|                                        | 7-KR                | tggagtttgtgcaggacgggagaaatttctggtatccccgaggggCATATGAATATC<br>CTCCTTAG     |                   |
|                                        | 7-VF                | TTCGATGAACCGACAAAAGG                                                      |                   |
|                                        | 7-VR                | GGGTGAAAGAGGCGATGAT                                                       | 54°C, 2.5min      |
| $\Delta 8$                             | 8-KF                | ttaccgcagctgcctcgcacgcttcgggatgacggtgaaaacctctgaGTGTAGGCTGGA<br>GCTGCTTC  | 68°C, 90s         |
|                                        | 8-KR                | agcagacaccgctcgcagccgaacgaccgagtagctagctagcagtgCATATGAATAT<br>CCTCCTTAG   |                   |
|                                        | 8-VF                | CACGGAGGCATCAGTACTA                                                       | 54.9°C,<br>2.5min |
|                                        | 8-VR                | CAGCCTTTTCCTGGTTCTTG                                                      |                   |
| $\Delta ABC$                           | ABC-KF              | aattctagataacataaagcccgaatatacgggcttaaggattataaaGTGTAGGCTGGAG<br>CTGCTTC  | 64.5°C, 90s       |
|                                        | ABC-KR              | atattctaaattttctatgatttcttttataagattattcattCATATGAATATCCTCCTT<br>AG       |                   |
|                                        | ABC-VF              | GCGAAAAGATGTTTGAATGA                                                      | 52.7°C, 90s       |
|                                        | ABC-VR              | TCGGGAAAGTTGTCATTTGC                                                      |                   |
| $\Delta hp1$                           | hp1-KF              | ataaatgataactattctcatctacattcaaatataaattgggggtgtGTGTAGGCTGGAGC<br>TGCTTC  | 65.7°C, 90s       |
|                                        | hp1-KR              | aataaaatcaattataatcctaaagcccgatattacgggctttatgCATATGAATATCCTC<br>CTTAG    |                   |
|                                        | hp1-VF              | ACTGGCTGCAAAAACCTTGT                                                      | 53.2°C, 75s       |
|                                        | hp1-VR              | TTTCTCCTATTGAATCTTTATTGTCA                                                |                   |
| $\Delta cupin$                         | cupin KF            | aatafacctaaagcacagattatagatcacacaaacatgaggttataaaGTGTAGGCTGGAG<br>CTGCTTC | 66.5°C, 3min      |
|                                        | cupin KR            | agtttatatcgatgaaaaatctaaggggaagcccccttagaatatggCATATGAATATCC<br>TCCTTAG   |                   |
|                                        | cupin VF            | AAAGAGGAAAACAAGGAAAAGCA                                                   | 54°C, 2min        |
|                                        | cupin VR            | GCATTGCTTGTGTTTCAGGG                                                      |                   |
| $\Delta DUF4440$                       | DUF4440<br>KF       | aaaaataaaactgaacatataaccattaatctaaggggcttccccGTGTAGGCTGGAG<br>CTGCTTC     | 68°C, 3min        |
|                                        | DUF4440<br>KR       | aggaatgttgggatagattagagggaatagatagaggaggttagtCATATGAATATC<br>CTCCTTAG     |                   |
| $\Delta DUF2164$                       | DUF2164<br>KF       | tgcattataaccattctttctattagatttaagtctgatttaaattagGTGTAGGCTGGAGCTG<br>CTTC  | 68°C, 3min        |
|                                        | DUF2164<br>KR       | tgataggaaaatgttatattattaattttgtgaggctcataaagaCATATGAATATCCTC<br>CTTAG     |                   |
| $\Delta DUF4440$ &<br>$\Delta DUF2164$ | DUF4440/<br>2164 VF | GGCACAATGTTACGACTCAGA                                                     | 55°C, 90s         |
|                                        | DUF4440/<br>2164 VR | GTTTCAGCGGTGCGTACAAT                                                      |                   |
| $\Delta hp2$                           | hp2 KF              | aaattacaactcaaccatactgcaacctggaatttccaagcaagcatatGTGTAGGCTGGAG<br>CTGCTTC | 68°C, 3min        |
|                                        | hp2 KR              | tgtcttgctggcaattcctgcgtgattcacatggctgcatagctatgcCATATGAATATCCT<br>CCTTAG  |                   |
|                                        | hp2 VF              | TCCTCTGATTCAAAGTGTCCAAG                                                   | 55°C, 90s         |
|                                        | hp2 VR              | TGTTGCTGTGTTTTGCTTCT                                                      |                   |
| $\Delta hp3$                           | hp3 KF              | aggcaaacacagcaacaaaagacacaccagaatcgcccgatgcgttGTGTAGGCTGG<br>AGCTGCTTC    | 68°C, 3min        |

|                                            |                                        |                                                                           |                  |
|--------------------------------------------|----------------------------------------|---------------------------------------------------------------------------|------------------|
|                                            | hp3 KR                                 | acagcgagaacaggagataagggatgaacggctgatacaggaacgcaacCATATGAATA<br>TCCTCCTTAG | 55°C, 90s        |
|                                            | hp3 VF                                 | GAATTGCCAGCCAGAGACAG                                                      |                  |
|                                            | hp3 VR                                 | GGTCATGCAGTTGAGTCAGC                                                      |                  |
| <i>ΔtonB</i>                               | tonB-KF                                | tgcatttaaaatcgagacctggttttctactgaaatgattatgacttcaGTGTAGGCTGGAGC<br>TGCTTC | 68.6°C, 90s      |
|                                            | tonB-KR                                | ctgttgagtaatgcaaaagcctccggcgaggcttttgactttctgcCATATGAATATCCT<br>CCTTAG    |                  |
|                                            | tonB-VF                                | AACATAACAACACGGGCACAA                                                     | 54.9°C, 75s      |
|                                            | tonB-VR                                | GACGACATCGGTCAGCATT                                                       |                  |
| <i>ΔtolC</i>                               | tolC-KF                                | aattttacagtttgatcgcgctaataactgcttcaccacaaggaatgcaGTGTAGGCTGGAG<br>CTGCTTC | 64.5°C, 90s      |
|                                            | tolC-KR                                | atctttacgttgcttacgttcagacggggccgaagccccgctgctgcaCATATGAATATCC<br>TCCTTAG  |                  |
|                                            | tolC-VF                                | CCAAATGTAACGGGCAGGTT                                                      | 56°C, 2.5min     |
|                                            | tolC-VR                                | GCGTGGCGTATGGATTTTGT                                                      |                  |
| pBAD18:: <i>tolC</i>                       | pBAD18<br>tolC L<br>insert             | GCTAGCGAATTCGAGCTCGGTACCCGGGGGAATCCGCAATAAT<br>TTTACAGTTTGATCGCG          | 62°C, 2.5min     |
|                                            | pBAD18<br>tolC R<br>insert             | GCTTGCATGCCTGCAGGTCGACTCTAGAGGATAACCCGTATCT<br>TTACGTTGCCTTACG            |                  |
|                                            | pBAD18<br>tolC R<br>plasmid            | CGTAAGGCAACGTAAGATACGGGTTATCCTCTAGAGTCGACC<br>TGCAGGCATGCAAGC             | 62°C, 5min       |
|                                            | pBAD18<br>tolC L<br>plasmid            | CGCGATCAAACGTAAAATTATTGCGGATTCCCCGGGTACCG<br>AGCTCGAATTCGCTAGC            |                  |
|                                            | pBAD18 F                               | CTGTTTCTCCATACCCGTT                                                       | 45°C,<br>2.25min |
|                                            | pBAD18 R                               | CTCATCCGCCAAAACAG                                                         |                  |
| pBR322::<br>p0.1229_3 <sup>2745-7950</sup> | pBR322<br>hp1<br>upstream L<br>insert  | GTATATATGAGTAACTTGGTCTGACAGCATTAAAAGAGGGCT<br>CAGAGGCAGAAAACG             | 56°C, 4min       |
|                                            | pBR322<br>end 7 R<br>insert            | GCGGCATTTTGCTTCCTGTTTTTTCGCAAATCGGCAACGGTGAT<br>TCCCTATCAGGG              |                  |
|                                            | pBR322<br>end 7 R<br>plasmid           | CCCTGATAGGGAATCACCGTTGCCGATTTCGCAAAAACAGGAA<br>GGCAAAAATGCCGC             | 62°C, 4min       |
|                                            | pBR322<br>hp1<br>upstream L<br>plasmid | CGTTTTCTGCCTCTGACGCCTCTTTAATGCTGTCAGACCAAGT<br>TTACTCATATATAC             |                  |
|                                            | pBR322-F                               | TTTGCAAGCAGCAGATTACG                                                      | 54.4°C, 2min     |
| pBR322-R                                   | GCCTCGTGATACGCCTATTT                   |                                                                           |                  |

692 ECRC, Penn State *E. coli* Reference Center; Amp<sup>R</sup>, ampicillin resistant; Cat<sup>R</sup>, chloramphenicol

693 resistant; Kan<sup>R</sup>, kanamycin resistant; Tet<sup>R</sup>, tetracycline resistant; *stx2a*, Shiga toxin 2a; *stx1a*,

694 Shiga toxin 1a; P<sub>araC</sub>, arabinose inducible promoter; T<sub>a</sub>, amplification temperature; KF, knockout  
695 forward; KR, knockout reverse; VF, verification forward; VR, verification reverse. Note: For the  
696 KF or KR primers, the lower-case letters indicate homologous regions to the target gene and the  
697 upper-case letters indicate the primer for the antibiotic resistant cassette. Superscript numbers  
698 indicate regions knocked out.

699

700 Fig. 1: PA2 was grown with various *E. coli* strains and Stx2a levels were measured using the R-  
701 ELISA. LB refers to PA2 grown in mono-culture. One-way ANOVA was used and bars marked  
702 with an asterisk were significantly higher than LB (Dunnett's test,  $p < 0.05$ ).

703

704 Fig. 2: The Stx2a levels (A) and fluorescence (B) of non-pathogenic *E. coli*, after PA2 growth in  
705 cell-free supernatant or W3110Δ*tolC* *PrecA-gfp* co-culture, respectively. Samples were  
706 normalized to cell density, OD<sub>600</sub> or OD<sub>620</sub>, for Stx2a or fluorescence, respectively. One-way  
707 ANOVA was used and levels marked with an asterisk were significantly higher than LB  
708 (Dunnett's test,  $p < 0.05$ ). The Stx2a levels (C) of PA2 grown in 0.1229 cell-free supernatant  
709 (2C-left) or LB (2C-right) with or without heat and Proteinase K treatments. Two-way ANOVA  
710 was used and bars marked with an asterisk were significantly lower than untreated 0.1229 or LB  
711 (Dunnett's test,  $p < 0.05$ ).

712

713 Fig. 3: Plasmid comparisons of individual 0.1229 plasmids and publicly available plasmids from  
714 NCBI by BLAST and visualized with BRIG. The colored rings indicate sequence similarity and  
715 the outer grey ring denotes annotated ORFs. The MccB17 operon is labeled *mcbA-mcbG*, and  
716 five antimicrobial resistance genes, macrolide (*mph(A)*), tetracycline (*tet(A)*), sulphonamide

717 (*sulI*), aminoglycoside (*aadA2*), and trimethoprim (*dfrA12*) were identified (B). Ampicillin  
718 resistance gene (*blaTEM-1B*) and four ORFs, *hp1*, *abc*, *cupin* and *hp2* are also labeled (C). NCBI  
719 accession numbers are pUTI89 (CP000244), pRS218 (CP007150), pECO-fce (CP015160), pSF-  
720 173-1 (CP012632), pHUSEC41-3 (NC\_018997), and pEC16II (KU932034).

721

722 Fig. 4: The Stx2a levels (A) and fluorescence (B) of 0.1229, its MccB17 knockouts and ZK1526,  
723 after PA2 growth in cell-free supernatant or W3110 $\Delta$ *tolC* *PrecA-gfp* co-culture, respectively.  
724 Samples were normalized to cell density, OD<sub>600</sub> or OD<sub>620</sub>, for Stx2a or fluorescence, respectively.  
725 One-way ANOVA was used and bars marked with an asterisk were significantly lower than  
726 0.1229 (Dunnett's test,  $p < 0.05$ ).

727

728 Fig. 5: PA2 was grown in the cell-free supernatant of 0.1229, C600 containing p0.1229\_3 and  
729 C600. Stx2a levels were measured using the R-ELISA. LB refers to PA2 grown in LB broth.  
730 One-way ANOVA was used and bars marked with an asterisk were significantly higher than LB  
731 (Fisher's LSD test,  $p < 0.05$ ).

732

733 Fig. 6: PA2 was grown in the cell-free supernatant of 0.1229 knockouts (A & C). Portion of  
734 p0.1229\_3 is depicted with predicted open reading frames (ORFs) (B). The colored triangles  
735 indicate the name of the regional knockout., PA2 grown in the supernatant of a C600 strain  
736 containing a portion of p0.1229\_3 (pBR322::p0.1229\_3<sup>2745-7950</sup>) (C). Stx2a levels measured  
737 using the R-ELISA. LB refers to PA2 grown in LB broth. One-way ANOVA was used and bars  
738 marked with an asterisk were significantly lower than 0.1229 (Fisher's LSD test,  $p < 0.05$ ).

739

740 Fig. 7: W3110 $\Delta$ *tolC* *PrecA-gfp* was grown in co-culture with 0.1229, 0.1229 $\Delta$ *tolC* and  
741 0.1229 $\Delta$ *tolC* pBAD18 containing strains, and fluorescence was measured. Samples were  
742 normalized to cell density, OD<sub>620</sub>. One-way ANOVA was used and bars marked with an asterisk  
743 were significantly higher than LB (Dunnett's test,  $p < 0.05$ ).

744

745 Fig. 8: Plasmid expressing *PrecA-gfp* was electroporated into MG1655, MG1655 $\Delta$ *tonB*,  
746 MG1655 $\Delta$ *tonB* pBAD24 and MG1655 $\Delta$ *tonB* pBAD24::*tonB*. These strains were grown in co-  
747 culture with 0.1229, or by themselves (LB). Two-way ANOVA was used and bars marked with  
748 an asterisk were significantly higher than their respective monoculture control (Dunnett's test,  $p$   
749  $< 0.05$ ).

750

751 Fig. 9: PA2 was grown in the cell-free supernatant of 0.1229 and three human fecal *E. coli*  
752 isolates (A). Stx2a levels measured using the R-ELISA. LB refers to PA2 grown in LB broth.  
753 One-way ANOVA was used and bars marked with an asterisk were significantly higher than LB  
754 (Dunnett's test,  $p < 0.05$ ). p0.1229\_3 was compared to the contigs of 99.0750, 91.0593 and  
755 90.2723 using BLAST and visualized using BRIG (B).

756

757 Fig. S1: W3110 $\Delta$ *tolC* *PrecA-gfp* was grown with 0.1229 and 0.1229 regional (A) or individual  
758 ORF (B) knockouts, or alone indicated by LB. One-way ANOVA was used and levels marked  
759 with an asterisk were significantly lower than 0.1229 (Dunnett's test,  $p < 0.05$ ).

760

761 Fig. S2: A portion of p0.1229\_3 is compared to *K. pneumoniae* TR152 (SAMEA3729690), *S.*  
762 *sonnei* 143778 (SAMEA2057991), *E. coli* HUSEC41 (PRJEA73977), *E. coli* HVH206

763 (SAMN01885845). \* indicates one amino acid (aa) difference in that ORF. # indicates seven aa  
764 differences in that ORF. The grey shaded region is >99.6% nucleotide identical between all  
765 strains.

766

767 Fig. S3: Hp1 protein was compared to genomes on Integrated Microbial Genomes &  
768 Microbiomes of DOE's Joint Genome Institute. Using BLASTp, isolates were compared, sorted  
769 by BIT score, and then one strain from the top ten species were selected. % identity ranged from  
770 32 to 68%. Hp1 homologs are colored in red. 8/10 have ABC transporters adjacent to Hp1,  
771 colored in light blue or maroon. 9/10 have an annotated region similar to Cupin, colored in pale  
772 yellow, typically adjacent to the ABC transporter. DUF2164 is found in five strains, one in the  
773 reverse direction than Hp1. The *Burkholderia cepacia* strain encodes L-arabinose system  
774 upstream of Hp1. The bracket indicates groupings of Hp1, ABC and Cupin.

775

776 Fig. S4: W3110 $\Delta$ *tolC* *PrecA-gfp* was grown with 0.1229 or 101 human fecal isolates from the *E.*  
777 *coli* Reference Center at Penn State. As a control, W3110 *PrecA-GFP* was grown by itself  
778 indicated by LB. One-way ANOVA was used and levels marked with an asterisk were  
779 significantly higher than LB (Dunnett's test,  $p < 0.05$ ).

780

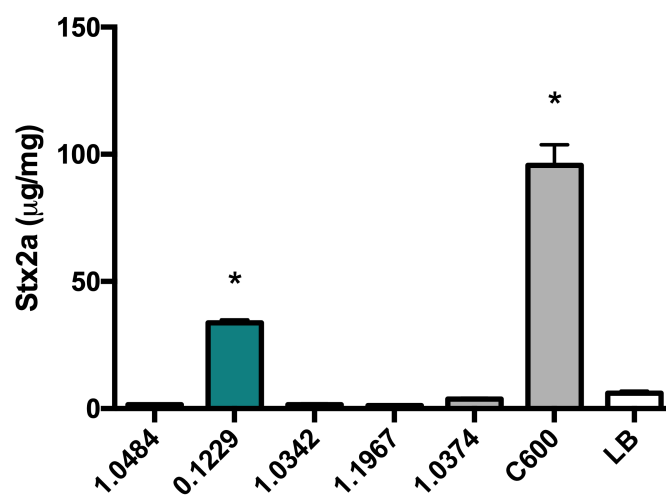

Fig. 1: PA2 was grown with various *E. coli* strains and Stx2a levels were measured using the R-ELISA. LB refers to PA2 grown in mono-culture. One-way ANOVA was used and bars marked with an asterisk were significantly higher than LB (Dunnett's test,  $p < 0.05$ ).

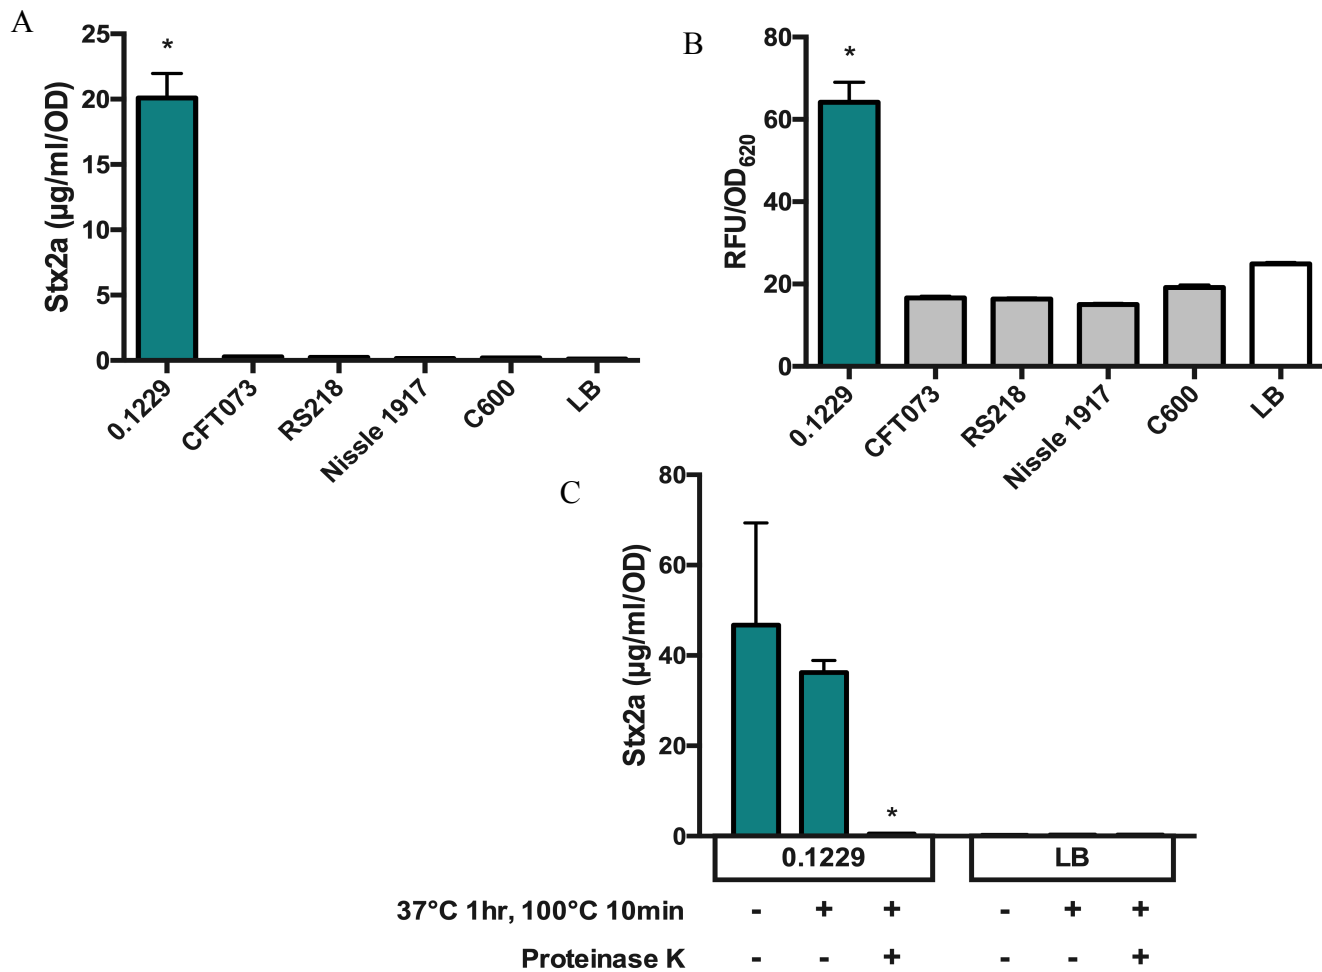

Fig. 2: The Stx2a levels (A) and fluorescence (B) of non-pathogenic *E. coli*, after PA2 growth in cell-free supernatant or W3110Δ*tolC* *PrecA-gfp* co-culture, respectively. Samples were normalized to cell density, OD<sub>600</sub> or OD<sub>620</sub>, for Stx2a or fluorescence, respectively. One-way ANOVA was used and levels marked with an asterisk were significantly higher than LB (Dunnett's test,  $p < 0.05$ ). The Stx2a levels (C) of PA2 grown in 0.1229 cell-free supernatant (2C-left) or LB (2C-right) with or without heat and Proteinase K treatments. Two-way ANOVA was used and bars marked with an asterisk were significantly lower than untreated 0.1229 or LB (Dunnett's test,  $p < 0.05$ ).



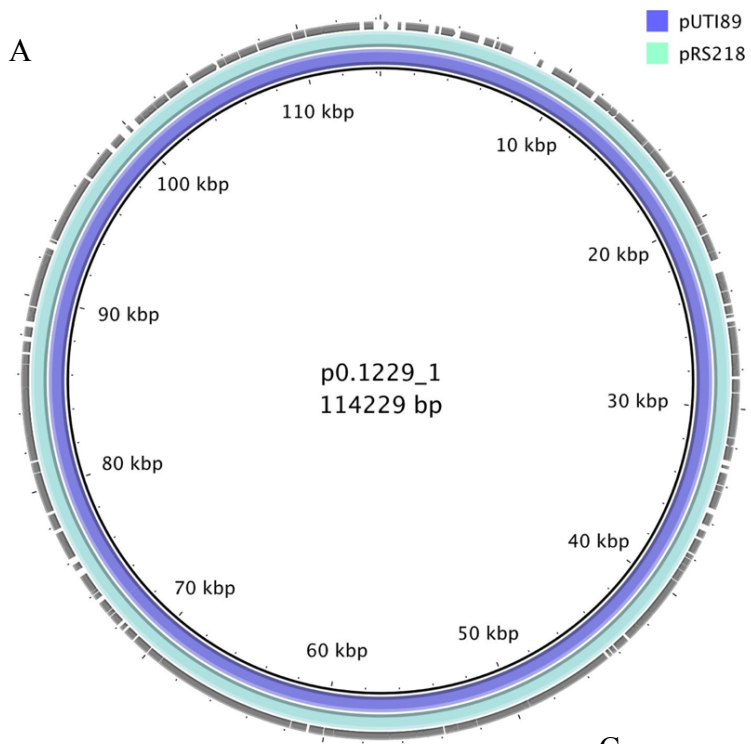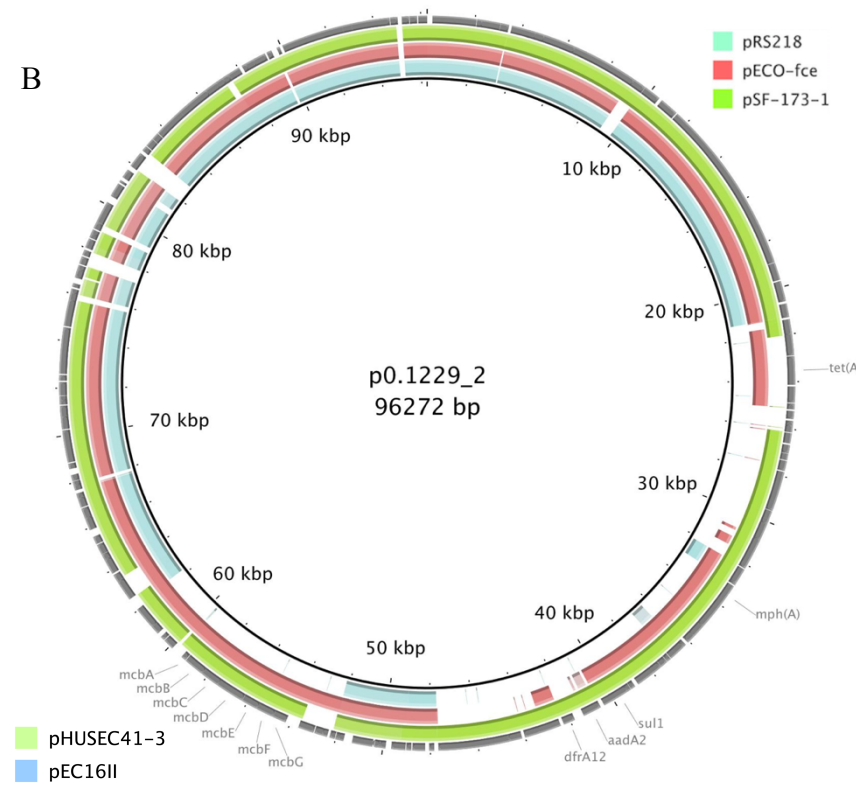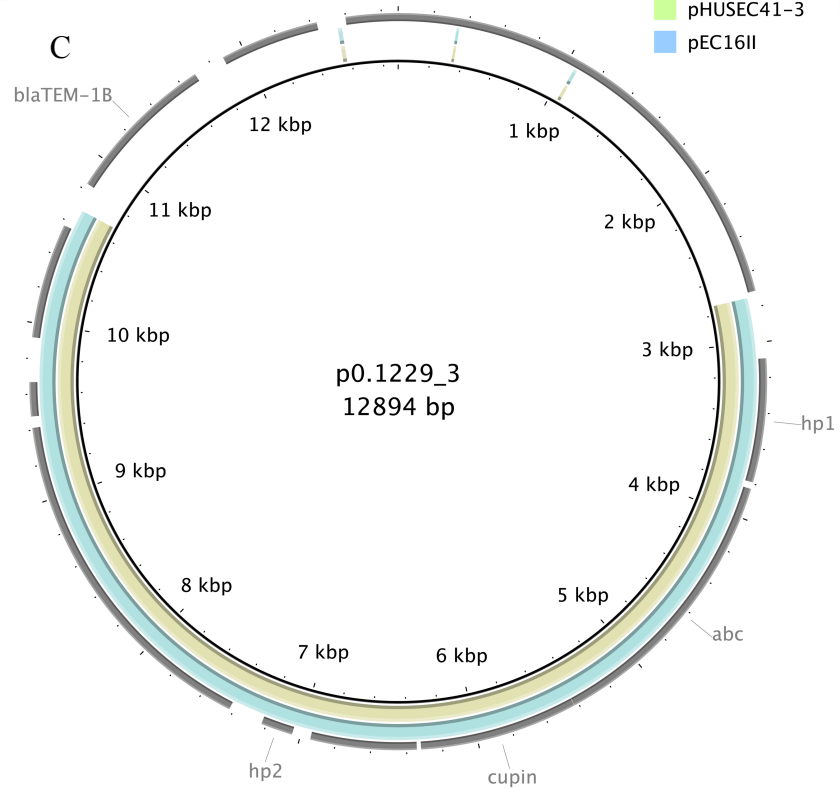

Fig. 3: Plasmid comparisons of individual 0.1229 plasmids and publicly available plasmids from NCBI by BLAST and visualized with BRIG. The colored rings indicate sequence similarity and the outer grey ring denotes annotated ORFs. The MccB17 operon is labeled *mcbA-mcbG*, and five antimicrobial resistance genes, macrolide (*mph(A)*), tetracycline (*tet(A)*), sulphonamide (*sul1*), aminoglycoside (*aadA2*), and trimethoprim (*dfrA12*) were identified (B). Ampicillin resistance gene (*blaTEM-1B*) and four ORFs, *hp1*, *abc*, *cupin* and *hp2* are also labeled (C). NCBI accession numbers are pUTI89 (CP000244), pRS218 (CP007150), pECO-fce (CP015160), pSF-173-1 (CP012632), pHUSEC41-3 (NC\_018997), and pEC16II (KU932034).

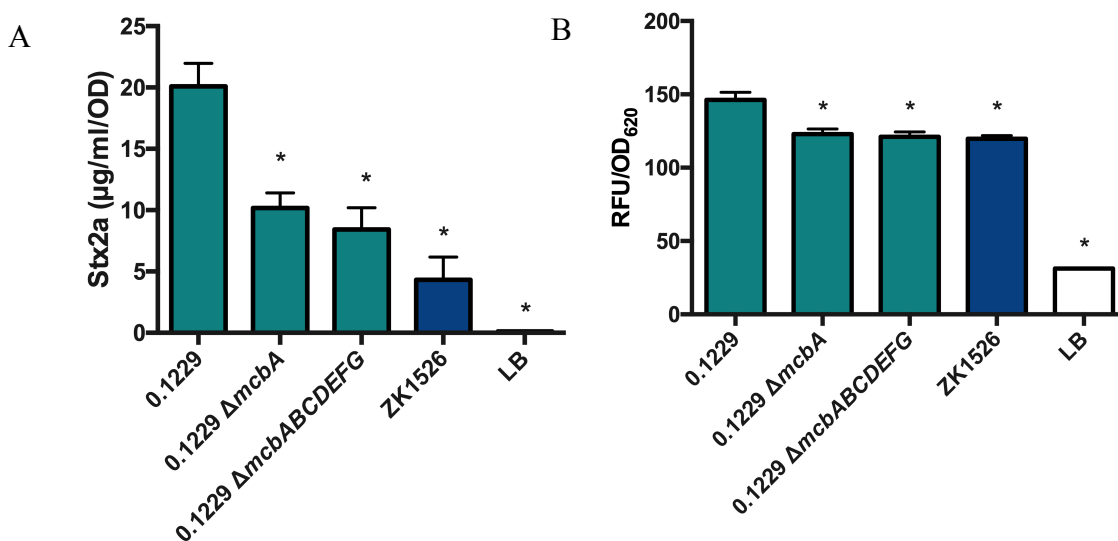

Fig. 4: The Stx2a levels (A) and fluorescence (B) of 0.1229, its MccB17 knockouts and ZK1526, after PA2 growth in cell-free supernatant or W3110Δ*tolC* *PrecA-gfp* co-culture, respectively. Samples were normalized to cell density, OD<sub>600</sub> or OD<sub>620</sub>, for Stx2a or fluorescence, respectively. One-way ANOVA was used and bars marked with an asterisk were significantly lower than 0.1229 (Dunnett's test,  $p < 0.05$ ).

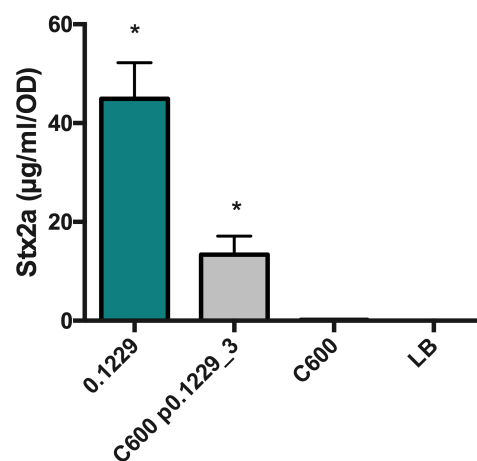

Fig. 5: PA2 was grown in the cell-free supernatant of 0.1229, C600 containing p0.1229\_3 and C600. Stx2a levels were measured using the R-ELISA. LB refers to PA2 grown in LB broth. One-way ANOVA was used and bars marked with an asterisk were significantly higher than LB (Fisher's LSD test,  $p < 0.05$ ).

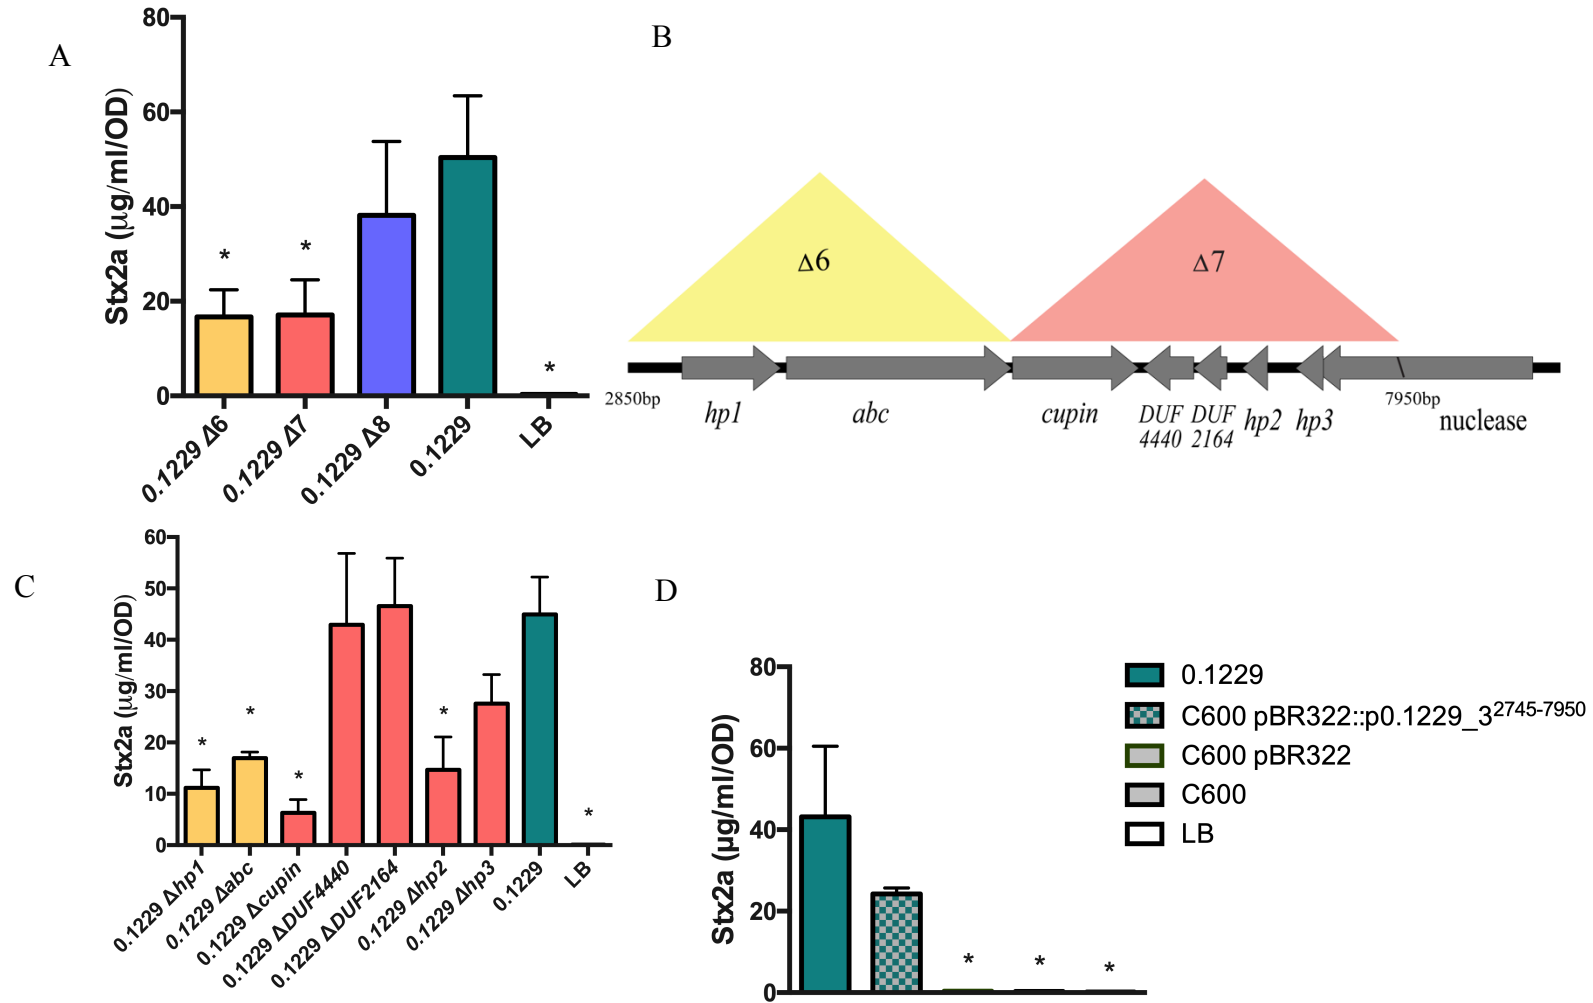

Fig. 6: PA2 was grown in the cell-free supernatant of 0.1229 knockouts (A & C). Portion of p0.1229\_3 is depicted with predicted open reading frames (ORFs) (B). The colored triangles indicate the name of the regional knockout., PA2 grown in the supernatant of a C600 strain containing a portion of p0.1229\_3 (pBR322::p0.1229\_3<sup>2745-7950</sup>) (C). Stx2a levels measured using the R-ELISA. LB refers to PA2 grown in LB broth. One-way ANOVA was used and bars marked with an asterisk were significantly lower than 0.1229 (Fisher's LSD test,  $p < 0.05$ ).

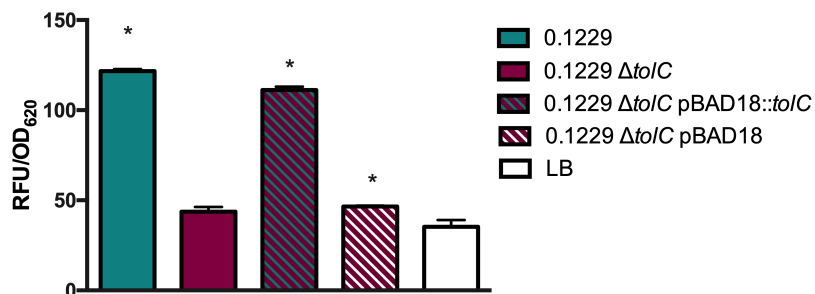

Fig. 7: W3110 $\Delta tolC$  *PrecA-gfp* was grown in co-culture with 0.1229, 0.1229 $\Delta tolC$  and 0.1229 $\Delta tolC$  pBAD18 containing strains, and fluorescence was measured. Samples were normalized to cell density, OD<sub>620</sub>. One-way ANOVA was used and bars marked with an asterisk were significantly higher than LB (Dunnett's test, p < 0.05).

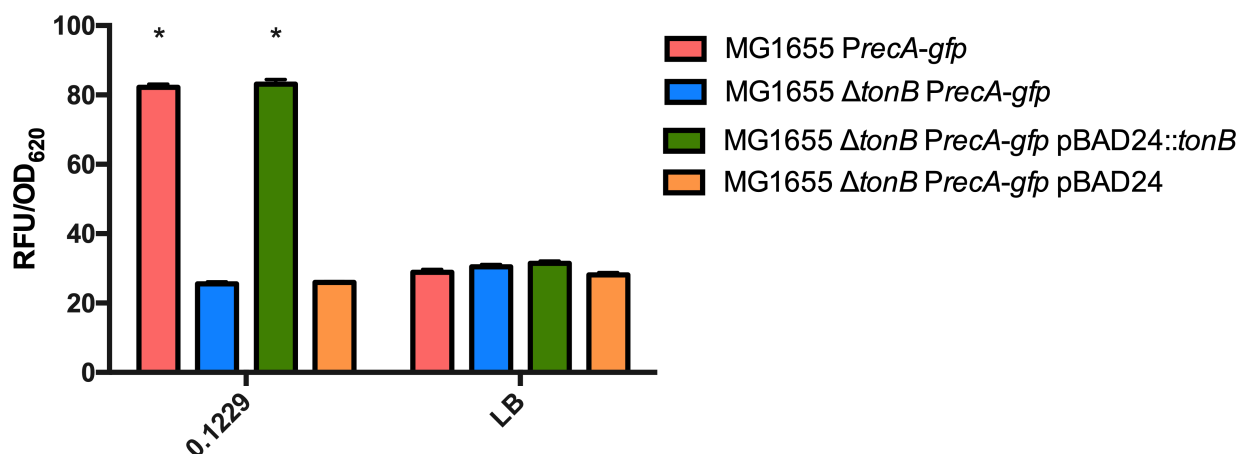

Fig. 8: Plasmid expressing *PrecA-gfp* was electroporated into MG1655, MG1655 $\Delta$ *tonB*, MG1655 $\Delta$ *tonB pBAD24* and MG1655 $\Delta$ *tonB pBAD24::tonB*. These strains were grown in co-culture with 0.1229, or by themselves (LB). Two-way ANOVA was used and bars marked with an asterisk were significantly higher than their respective monoculture control (Dunnett's test,  $p < 0.05$ ).

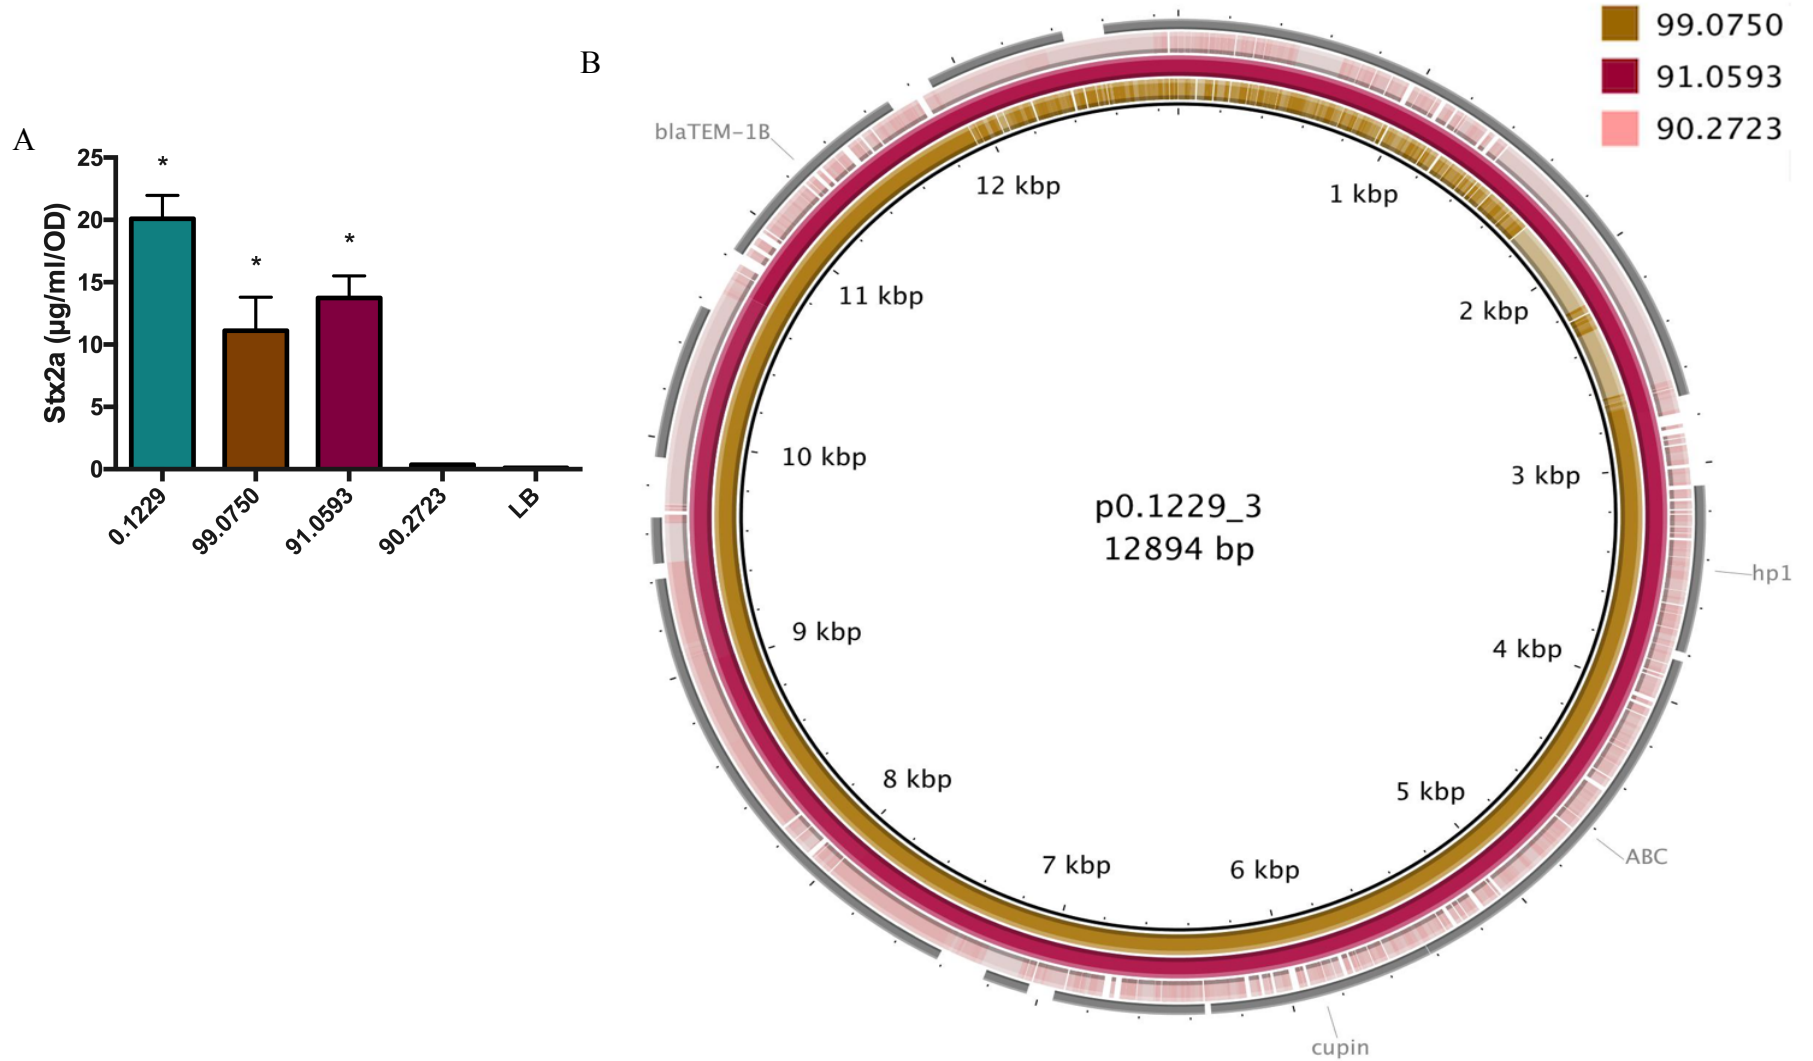

Fig. 9: PA2 was grown in the cell-free supernatant of 0.1229 and three human fecal *E. coli* isolates (A). Stx2a levels measured using the R-ELISA. LB refers to PA2 grown in LB broth. One-way ANOVA was used and bars marked with an asterisk were significantly higher than LB (Dunnett's test,  $p < 0.05$ ). p0.1229\_3 was compared to the contigs of 99.0750, 91.0593 and 90.2723 using BLAST and visualized using BRIG (B).
